# 1                    **Phagocytic predation by the fungivorous amoeba**

## 2                    ***Protostelium aurantium* targets metal ion and redox homeostasis**

3  
4  
5                    Silvia Radosa<sup>1,2</sup>, Jakob L. Sprague<sup>1,2</sup>, Renáta Tóth<sup>3</sup>, Thomas Wolf<sup>4</sup>, Marcel Sprenger<sup>2,5</sup>,  
6                    Sascha Brunke<sup>5</sup>, Gianni Panagiotou<sup>4</sup>, Jörg Linde<sup>6</sup>, Attila Gácsér<sup>3</sup>, and Falk Hillmann<sup>1\*</sup>

7  
8  
9  
10  
11                    <sup>1</sup>Junior Research Group *Evolution of Microbial Interaction*, Leibniz Institute for Natural  
12                    Product Research and Infection Biology - Hans Knöll Institute (HKI), Jena, Germany

13  
14                    <sup>2</sup>Institute of Microbiology, Friedrich Schiller University Jena, Jena, Germany

15  
16                    <sup>3</sup>Department of Microbiology, University of Szeged, Szeged, Hungary

17  
18                    <sup>4</sup>Research Group Systems Biology and Bioinformatics, Leibniz Institute for Natural Product  
19                    Research and Infection Biology - Hans Knöll Institute (HKI), Jena, Germany

20  
21                    <sup>5</sup>Department of Microbial Pathogenicity Mechanisms, Leibniz Institute for Natural Product  
22                    Research and Infection Biology - Hans Knöll Institute (HKI), Jena, Germany

23  
24                    <sup>6</sup>Institute of Bacterial Infections and Zoonoses, Federal Research Institute for Animal Health  
25                    – Friedrich-Löffler-Institute, Jena, Germany.

26  
27  
28                    \*for correspondence

29                    Email: Falk.hillmann@leibniz-hki.de

30                    Phone: +49-3641-532-1445

31                    Fax: +49-3641-532-2445

## 32 **Summary**

33 Predatory interactions among microbes are considered to be a major evolutionary driving  
34 force for biodiversity and the defense against phagocytic killing. The fungivorous amoeba  
35 *Protostelium aurantium* has a wide fungal food spectrum but strongly discriminates among  
36 major pathogenic members of the *Saccharomycotina*. While *C. albicans* is not recognized,  
37 *C. glabrata* is rapidly internalized, but remains undigested. Phagocytic killing and feeding by  
38 *P. aurantium* is highly effective for the third major fungal pathogen, *C. parapsilosis*. Here we  
39 show that the different prey patterns of the three yeasts were reflected by distinct  
40 transcriptional responses, indicating fungal copper and redox homeostasis as primary targets  
41 during intracellular killing of *C. parapsilosis*. Gene deletions in this fungus for the highly  
42 expressed copper exporter Crp1 and the peroxiredoxin Prx1 confirmed their role in copper  
43 and redox homeostasis, respectively and identified methionine biosynthesis as a ROS  
44 sensitive metabolic target during predation. Both, intact Cu export and redox homeostasis  
45 contributed to the survival of *C. parapsilosis* not only when encountering *P. aurantium*, but  
46 also in the presence of human macrophages. As both genes were found to be widely  
47 conserved within the entire *Candida* clade, our results suggest that they could be part of a  
48 basic tool-kit to survive phagocytic attacks by environmental predators.

## 49 **Introduction**

50 Members of the genus *Candida* are among the leading causative agents of fungal infections  
51 worldwide with *Candida albicans* being responsible for the majority of candidiasis cases,  
52 followed by *C. glabrata* and *C. parapsilosis* (1). All three *Candida* species are known to be  
53 commensals and are frequently residing in oral cavities, the gastrointestinal tract, vaginal  
54 mucosa or on the skin. Environmental reservoirs for any of these species have rarely been  
55 documented, but recent isolations of *C. parapsilosis* or *C. albicans* from pine and oak trees,  
56 respectively, suggest that these might exist (2-4). *C. glabrata*, in turn, has been enriched from  
57 fermented foods and grape juice (5, 6). Within the human host, all three are able to counteract  
58 the phagocytic attacks of macrophages and neutrophilic granulocytes to some extent, using  
59 different strategies and molecular tool-kits (7).

60 An outer layer of mannoproteins masks pathogen-associated molecular patterns (PAMPs) on  
61 the surface of *C. albicans*, thus hindering the initial recognition of the fungus *via* cell wall  $\beta$ -  
62 glucans (8). Even after its ingestion, *C. albicans* can escape from innate immune phagocytes  
63 by hyphae formation which triggers the cytolytic death of the host cell (9-11). *C. parapsilosis*  
64 is also able to survive in the restricted phagosomal environment and forms pseudohyphae  
65 after its internalization by macrophages (12). However, its rates of ingestion and killing by  
66 neutrophils and macrophages were reported to be higher than for *C. albicans* (12-14).  
67 Intracellular filamentation, in turn, is not observed for *C. glabrata*, which instead can survive  
68 and even replicate in the yeast form inside modified phagosomal compartments of  
69 macrophages (15, 16).

70 Estimates indicate that *C. glabrata* may be separated from the other two *Candida* species by  
71 more than 300 million years (17), well before their establishment as commensals.  
72 Comparative genome analysis of *C. glabrata* and its closest relatives have suggested that  
73 adaptations preceding its commensal stage may have facilitated traits that later enabled  
74 pathogenicity (18-20). Fungal infections originating from species even without any clear  
75 history of commensalism have further raised questions on the role of environmental factors as  
76 early promoters of virulence-associated traits.

77 Predator-prey interactions are considered as drivers of an evolutionary arms race and occur  
78 frequently, even among microbes. Humans and higher animals are indirectly affected, as some  
79 microbial defenses against phagocytic predators are thought to be also effective against innate  
80 immune cells such as macrophages and neutrophilic granulocytes. These trained defenses may  
81 have favored certain microbes to establish commensalism or appear as new pathogens (21).  
82 Experimental studies have corroborated this idea using well-known model amoebae such as

83 *Dictyostelium discoideum* or *Acanthamoeba castellanii* (22-26). *Protostelium aurantium* is  
84 another representative of a wide-spread group of amoebae with a fungivorous life-style (27-  
85 31). The amoeba was recently found to feed on a wide range of basidiomycete and  
86 ascomycete yeast species, with *C. parapsilosis* being the most efficient food source, while  
87 *C. albicans* and *C. glabrata* escaped the predation at the stage of recognition or intracellular  
88 processing, respectively (32). In this study, we investigated the responses of *C. albicans*, *C.*  
89 *glabrata*, and *C. parapsilosis* when confronted with the fungivorous predator. Our findings  
90 demonstrate that copper and redox homeostasis are central targets during phagocytic  
91 predation by *P. aurantium* and suggest that such basic anti-phagocytic defense strategies may  
92 have been trained during an arms race with an environmental predator.

## 93 **Results**

### 94 **The predation responses of the three *Candida* species reflect their different prey patterns**

95 While *C. albicans* and *C. glabrata* can escape *P. aurantium* at the stage of recognition or  
96 intracellular processing, respectively, *C. parapsilosis* serves as a highly efficient food source  
97 (32). To elucidate common, as well as species-specific reactions to the presence of the  
98 predator, we conducted high-throughput RNA sequencing of each of the three *Candida*  
99 species in co-cultures with *P. aurantium*. Yeast cells were confronted with trophozoites of *P.*  
100 *aurantium* for 30 and 60 minutes prior to sampling for RNA isolation. For *C. parapsilosis*, a  
101 total of 667 genes were upregulated ( $\log_2FC > 1.5$  with  $p < 0.01$  according to EdgeR), and 588  
102 genes were downregulated ( $\log_2FC < -1.5$ ,  $p < 0.01$ ), while in *C. albicans*, a total of 903 genes  
103 were upregulated, and 937 genes were downregulated at both time points (Fig. 1A). In *C.*  
104 *glabrata*, 1218 genes were upregulated, while only 273 genes were found to be  
105 downregulated (Fig. 1A). A complete list of DEGs for each species and time point is given in  
106 Dataset S1.

107 To address the biological significance of up- and downregulated genes, we analyzed their  
108 gene ontology annotations for the enrichment of defined categories in *molecular function*, *cell*  
109 *component*, and *biological process* (Fig. 1B, Fig. S1, Dataset S2). Overall, the enriched  
110 categories for all three *Candida* species partially overlapped, most likely resulting from  
111 general metabolic adaptations: e. g. when grouped by *molecular function*, transferase and  
112 ligase activity were categories common to all three fungi among the upregulated genes.  
113 However, for *C. glabrata*, there was no significantly enriched *biological process* among the  
114 downregulated genes (Fig. S1). Also, transporter and kinase activity were the only two  
115 *molecular functions*, which were enriched among the downregulated genes of *C. glabrata*. In  
116 sharp contrast, transporters were found to be generally upregulated in *C. albicans* and *C.*  
117 *parapsilosis*. Higher expression levels of RNA binding, helicases, and nucleotidyl transferases  
118 were unique to *C. parapsilosis*, the preferred prey, implicating that transcription and  
119 translation could be most severely affected in this fungus. The finding that the nucleolus and  
120 *biological process* categories for RNA metabolism and ribosome biogenesis were all only  
121 enriched in *C. parapsilosis* also supports this conclusion. Further, the extracellular region and  
122 the cell wall were more severely affected in *C. parapsilosis* than in *C. albicans* or *C. glabrata*  
123 (Fig. 1B).

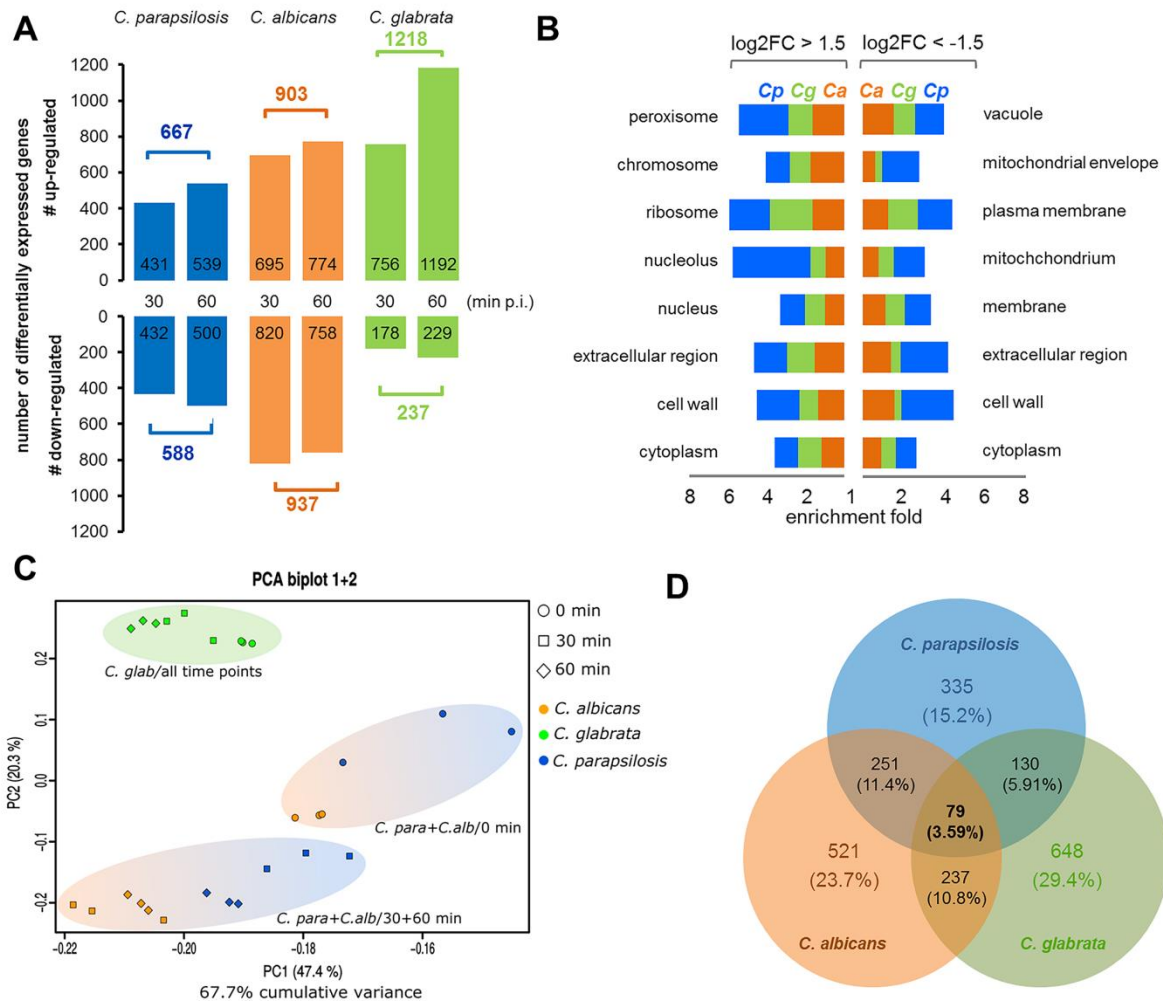

124

125 **Fig. 1: Differential gene expression in *C. parapsilosis*, *C. albicans*, and *C. glabrata* in response to**  
 126 ***P. aurantium*.** (A) Total numbers of differentially expressed genes (DEGs) of *Candida* spp. in the  
 127 presence of *P. aurantium* after 30 and 60 min. Genes were considered as differentially expressed when  
 128 the log<sub>2</sub> fold-change in the transcript level was ≥1.5 or ≤-1.5 and p≤0.01 according to EdgeR at either  
 129 of the two time points. (B) Gene ontology (GO) clusters for cellular components and their enrichment  
 130 in up- (left panel) and downregulated (right panel) genes of *C. parapsilosis* (Cp, blue), *C. glabrata*  
 131 (Cg, green), and *C. albicans* (Ca, orange) (C) Principle component analysis (PCA) for read count  
 132 values from all orthologous genes of the three *Candida* species. PC1 and PC2 explain about 68% of  
 133 the overall variance within the data set and clearly separate all *C. glabrata* samples (green, top left)  
 134 from those of *C. albicans* (orange) and *C. parapsilosis* (blue). For the two latter species, there is an  
 135 additional separation between control time-point at 0 min (round) and time points 30/60 min  
 136 (square/diamond). (D) Venn diagram displaying an overlap in the differential expression of all  
 137 common orthologues at 30 and 60 min. Of all 3,735 orthologues in total, 2,201 were differentially  
 138 expressed orthologues (DEOs) and 79 were common (3.6%) to all three species.  
 139

140 **The core response of *C. albicans*, *C. parapsilosis*, and *C. glabrata* to the presence of *P.***  
141 ***aurantium***

142 A principal component analysis was used to determine the dynamic variations in the  
143 orthologous DEGs. For *C. glabrata*, the expression of orthologous genes in response to  
144 amoeba predation was clearly distinguishable from *C. parapsilosis* and *C. albicans*, and also  
145 showed less variation between the different time points (Fig. 1C and the cluster dendrogram  
146 in Fig. S2). Although more than 1,200 genes were activated in *C. glabrata* overall, only 4 %  
147 of the differentially expressed orthologs were unique to the first time-point at 30 min. These  
148 numbers clearly differed for *C. parapsilosis* (15 %) and *C. albicans* (18 %), and thus,  
149 displayed more variance over time. For these two, it was also evident that their transcriptional  
150 profiles at 30 and 60 min clustered closer together than with any time-point from *C. glabrata*.  
151 To identify a common responsive gene set of all three fungi, we compared the differential  
152 expression among all their orthologues (DEOs). Of the overall 3,735 orthologous genes  
153 among the three species, differential expression was found for 2,201 genes at either one of the  
154 two later time points (Fig. 1D). Reflecting the diverse interaction patterns of the three species,  
155 only 79 orthologous genes were differentially regulated in all three *Candida* species,  
156 representing the core response to the presence of *P. aurantium* (Fig. 1D). Among those, 48  
157 genes were commonly induced and eight genes were commonly repressed in all three species  
158 at either of the time points, while 23 genes showed opposite regulation between the species  
159 (Fig. 2).

160

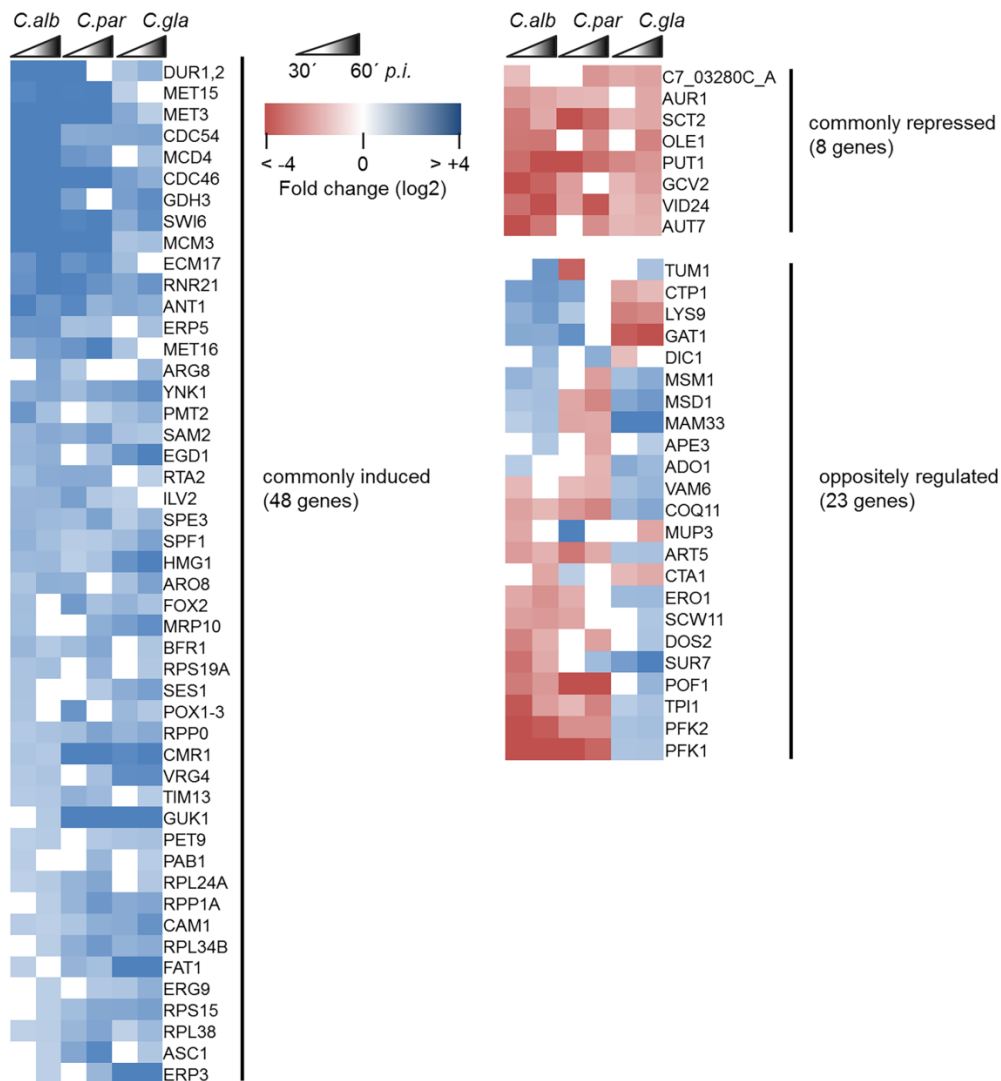

161

162 **Fig. 2: Heat map of expression for all 79 differentially expressed orthologues (DEOs) during the**  
 163 **confrontation with *P. aurantium*.** All DEOs were grouped according to their transcription profile at  
 164 30 min and 60 min *p.i.* in comparison to 0 min, and considered as commonly induced or commonly  
 165 repressed if they shared the same expression pattern among all three species. DEOs were considered as  
 166 oppositely regulated if their expression tendency differed in one of the three species. Red and blue  
 167 colors represent down- and upregulated genes, respectively. Gene names are based on the orthologues  
 168 of *C. albicans*.

169

170

171 The corresponding sets of genes were further analyzed for shared GO terms in biological  
 172 processes (Dataset S3). Commonly enriched categories included the sulfur amino acid  
 173 metabolic process (GO:0000096) comprising genes such as *SAM2*, *MET3*, *ECM17* (*MET5*),  
 174 *MET15*, and *MET16*; all playing a role in the metabolism of methionine. A plethora of genes,  
 175 predicted to be involved in organo-nitrogen compound biosynthetic process (GO:1901566)  
 176 such as the amino acid biosynthesis enzymes *ILV2* and *ARG8*, a P-type calcium-transporting  
 177 ATPase encoded by *SPF1*, or genes with role in fatty acid beta-oxidation (GO:0006635) like  
 178 *ANT1*, *FOX2* or *POX1-3*, were commonly induced as well. The most highly enriched GO



179 term was found to be “negative regulation of helicase activity” comprising three *MCM* genes:  
180 *CDC54* (*MCM4*), *CDC46* (*MCM5*), and *MCM3*; all known to be a part of Mcm-complex,  
181 necessary for unwinding the DNA double helix and triggering fork progression during DNA  
182 replication (33).

183 Noteworthy is the induction of the *DURI,2* gene in all three species, encoding the urea  
184 amidolyase and previously shown to be important for the survival of *C. albicans* in  
185 macrophages (34). No GO category was found to be enriched within the eight commonly  
186 downregulated genes. Nevertheless, three out of eight genes, namely *OLE1*, *SCT2* and *AURI*,  
187 function in lipid biosynthetic processes and most probably play an important role in the  
188 integrity of the cell membrane. Interestingly, GO enrichment analysis revealed the “glycolytic  
189 process through fructose-6-phosphate” (GO:0061615) as a highly overrepresented category  
190 within the oppositely regulated set of genes; all genes annotated to this category, namely  
191 *TPII*, *PFK1* and *PFK2*, were downregulated in *C. albicans* and *C. parapsilosis*, while in *C.*  
192 *glabrata* they showed an increase in transcript level.

193

#### 194 ***P. aurantium* predation targets copper and redox homeostasis in *C. parapsilosis***

195 Of all three species, *C. parapsilosis* represented the preferential food source for *P.*  
196 *aurantium* and thus, we conducted a deeper characterization of the 1255 DEGs (667 genes  
197 with  $\log_2FC \geq 1.5$ , and 588 genes with  $\log_2FC \leq -1.5$ ) from *C. parapsilosis* using the GO  
198 Slim tool which maps DEGs to more general terms and broad categories (35). Most genes  
199 were uncharacterized, could not be categorized and were involved in unknown biological  
200 processes or mapped to “regulation” as a general category. These were not further analyzed.  
201 “Transport” and “stress response” were the two most frequent biological processes and were  
202 further selected to search for more specific categories (Fig. 3). The “extra-nuclear transport of  
203 ribonucleoproteins” was highly enriched, as could be expected from the results obtained from  
204 the general enrichment analysis for *C. parapsilosis*. We further found the transport of  
205 transition metal ions to be overrepresented with several genes encoding orthologous proteins  
206 for the transport of Fe and Zn being differentially regulated in response to *P. aurantium*  
207 (Tables S1 and S2).

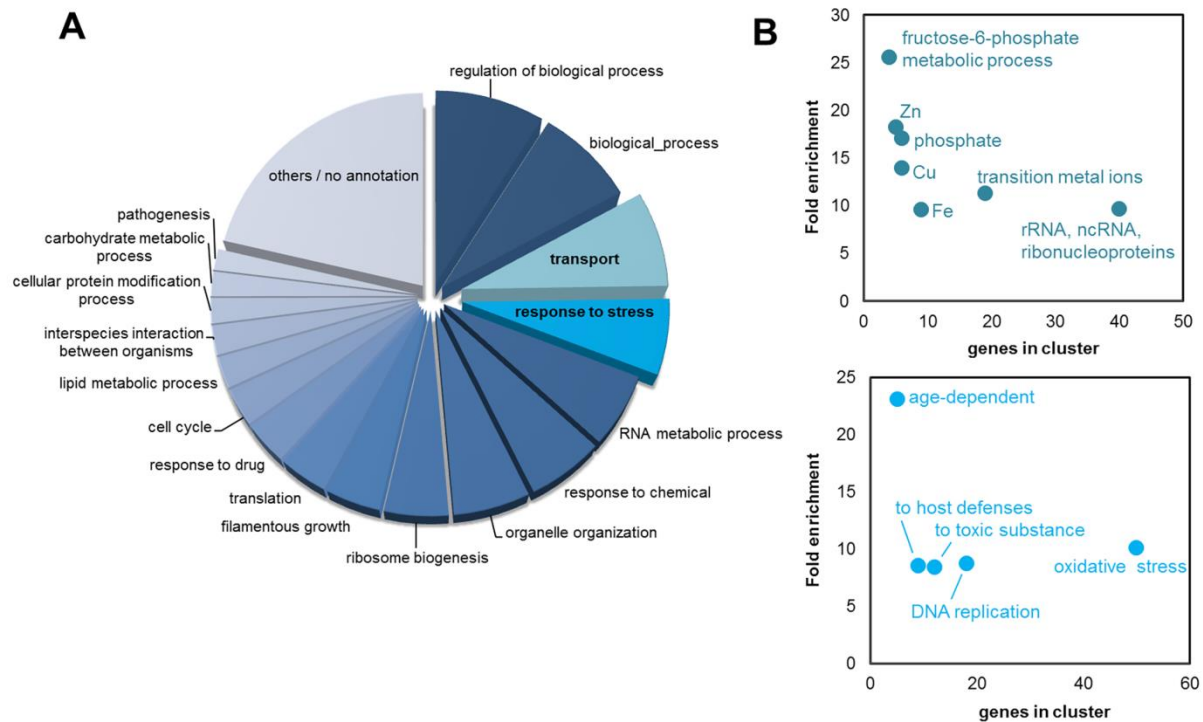

208

209 **Fig. 3: GO Slim categorization of the DEGs from *C. parapsilosis* during the confrontation with *P.***  
 210 ***aurantium*.** (A) All 1255 DEGs from 30 min and 60 min after the confrontation with *P. aurantium*  
 211 were categorized according to GO SLIM processes. (B) Genes mapped to the GO SLIM categories  
 212 “transport” and “response to stress” were further analyzed for more specific GO Terms. Categories  
 213 with the highest enrichment (top 7 for “transport” and top 5 for “response to stress”) are displayed as a  
 214 2D dot plot for the number of genes in the respective cluster and fold enrichment (p-value <0.005).

215

216 Two Cu transporters were among the most strongly differentially regulated genes in *C.*  
 217 *parapsilosis* (Table 1). The most upregulated gene upon amoeba predation ( $\log_2FC$  of approx.  
 218 9 at 30 min and 8 at 60 min) was found to be CPAR2\_203720. This gene is an orthologue to  
 219 of *C. albicans* *CRP1* (*orf19.4784*), encoding a copper-transporting P1-type ATPase, which  
 220 mediates Cu resistance and is induced by high Cu concentrations (36).

221 Interestingly, CPAR2\_602990, an orthologue of *C. albicans* *CTR1* (*orf19.3646*) with copper  
 222 importing activity was the second most downregulated gene at 30 min ( $\log_2FC = -9.8$ ) and no  
 223 reads for this gene were detected after 60 minutes in our RNA sequencing data (Table 1, “-  
 224 Inf”). Four other genes annotated as Cu transporters were also repressed at both time points.

225

226

227

228

229

230

231

232

233 **Table 1: Expression of *C. parapsilosis* genes involved in the transport of Cu ions (GO:0006825)**

| name                | log2FC<br>30 min | log2FC<br>60 min | description                                                                                                                                                                                                                  | <i>C. albicans</i> orthologue |
|---------------------|------------------|------------------|------------------------------------------------------------------------------------------------------------------------------------------------------------------------------------------------------------------------------|-------------------------------|
| <i>CPAR2_203720</i> | 9.36             | 8.18             | copper-exporting ATPase activity, role in cadmium ion transport, cellular copper ion homeostasis, copper ion transport, silver ion transport and plasma membrane localization                                                | <i>C1_09250W_A/CRP1</i>       |
| <i>CPAR2_210510</i> | -2.36            | -2.46            | copper uptake transmembrane transporter activity, role in cellular copper ion homeostasis, copper ion import, intracellular copper ion transport and fungal-type vacuole membrane localization                               | <i>C1_08620W_A/CTR2</i>       |
| <i>CPAR2_300620</i> | -7.66            | -8.01            | ferric-chelate reductase activity, role in copper ion import, iron ion transport and plasma membrane localization                                                                                                            | <i>C7_00430W_A</i>            |
| <i>CPAR2_406100</i> | -1.81            | -3.67            | copper ion transmembrane transporter activity, inorganic phosphate transmembrane transporter activity and role in cellular copper ion homeostasis, copper ion transmembrane transport, phosphate ion transmembrane transport | <i>C2_09590C_A</i>            |
| <i>CPAR2_701290</i> | -3.09            | -3.26            | copper ion binding activity, role in cellular protein-containing complex assembly, copper ion transport and mitochondrial inner membrane, plasma membrane localization                                                       | <i>CR_09300C_A/SCO1</i>       |
| <i>CPAR2_602990</i> | -9.79            | - Inf*           | Ortholog(s) have copper uptake transmembrane transporter activity, role in copper ion import, high-affinity iron ion transport and cytoplasm, nucleus, plasma membrane localization                                          | <i>C6_00790C_A/CTR1</i>       |

234 \*-Inf, no reads detected

235

236 The differential expression of these genes was validated by quantitative real-time PCR and we  
 237 further tested for whether they would also respond to phagocytosis by primary human  
 238 monocyte-derived human primary macrophages (MDMs). Only for the *CpCRP1* gene was  
 239 expression in response to both, *P. aurantium* and MDMs, in accordance, while the expression  
 240 of *CpCTR1* was regulated in an opposite manner when the yeast encountered MDMs (Fig.  
 241 4A+B). We further investigated the expression of *CpCRP1* and *CpCTR1* during *in vitro* Cu  
 242 excess and depletion. As expected, the putative Cuexporter gene *CpCRP1* showed induction  
 243 when *Candida* was treated with 100  $\mu$ M of Cu, and repression in the presence of the Cu  
 244 chelator BCS (Fig. 4C). Even though the expression of *CpCTR1* was not significantly  
 245 influenced by the presence of BCS in the media, a remarkable downregulation of this gene  
 246 was measured at high Cu concentration. It is noteworthy that differences in the expression  
 247 levels for both genes, *CpCRP1* and *CpCTR1*, were more pronounced during encounters with  
 248 *P. aurantium* than with macrophages or the metal itself.

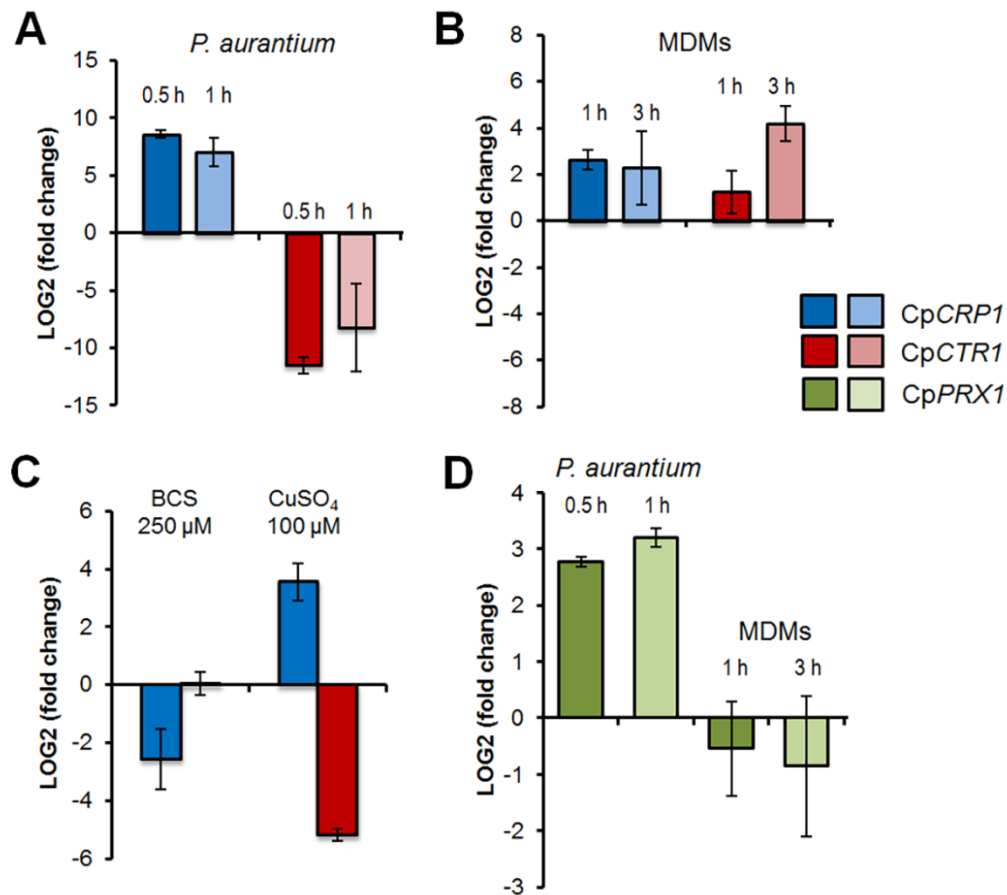

249

250 **Fig. 4: Expression of copper and redox homeostasis genes.** Expression of the *CRP1*  
251 (*CPAR2\_203720*), *CTR1* (*CPAR2\_602990*), and *PRX1* (*CPAR2\_805590*) of *C. parapsilosis* was  
252 analyzed by qRT-PCR using total RNA isolated after exposure to *P. aurantium* (A, D), human  
253 monocyte-derived macrophages (MDMs, B, D), and in the presence of the copper ion chelator BCS or  
254 CuSO<sub>4</sub> (C). All data show average expression levels relative to time point 0 based on three biological  
255 and three technical replicates. Error bars indicate the standard deviation.

256

257 Intriguingly, four genes encoding superoxide dismutases (SODs) of the Cu/Zn type  
258 (*CPAR2\_500330*, *CPAR2\_500390*, *CPAR2\_213540*, *CPAR2\_213080*) and one Fe/Mn-SOD  
259 (*CPAR2\_109280*) were strongly repressed in the presence of *P. aurantium* (Table 2). In  
260 contrast, genes involved in the thioredoxin antioxidant pathway were found to be highly  
261 upregulated, such as *CPAR2\_304080*, *CPAR2\_500130*, or *CPAR2\_805590*. The latter being  
262 an orthologous gene to *C. albicans PRX1*, a thioredoxin-linked peroxidase shown to be  
263 primarily involved in the reduction of cellular organic peroxides (37). More than a 5-fold  
264 increase in transcript level was observed in *C. parapsilosis* after 30 min of co-incubation with  
265 *P. aurantium*. This upregulation further increased to 9-fold after another 30 min of co-  
266 incubation with the predator, however, remained unaffected in response to primary  
267 macrophages (Fig. 4D).

268

269 **Table 2: Expression of *C. parapsilosis* genes\* involved in response to oxidative stress**  
 270 **(GO:0006979)**

| name         | log2FC<br>30 min | log2FC<br>60 min | description                                                                                                                                                                                           | <i>C. albicans</i> orthologue |
|--------------|------------------|------------------|-------------------------------------------------------------------------------------------------------------------------------------------------------------------------------------------------------|-------------------------------|
| CPAR2_805590 | 2.03             | 2.9              | thioredoxin peroxidase activity and role in cell redox homeostasis, cellular response to oxidative stress, response to cadmium ion, sporocarp development involved in sexual reproduction             | C7_02810W_A/PRX1              |
| CPAR2_101390 | 2.16             | 2.84             | NAD binding, nucleoside diphosphate kinase activity                                                                                                                                                   | C5_02890W_A/YNK1              |
| CPAR2_802460 | 3.24             | 3.75             | ribosomal large subunit binding, ribosomal small subunit binding activity and role in cellular response to oxidative stress, cytoplasmic translation                                                  | CR_00860C_A/TMA19             |
| CPAR2_213080 | -7.18            | -Inf**           | Ortholog(s) have superoxide dismutase activity and role in cellular response to superoxide, evasion or tolerance by symbiont of host-produced reactive oxygen species                                 | C2_00660C_A/SOD4              |
| CPAR2_803850 | -6.74            | -6.14            | Has domain(s) with predicted catalase activity, heme binding activity and role in oxidation-reduction process, response to oxidative stress                                                           | orf19.6229/CAT1               |
| CPAR2_806310 | -6.47            | -5.89            | ATPase activity, GTPase activity                                                                                                                                                                      | C2_09220W_A/DDR48             |
| CPAR2_500330 | -5               | -6.92            | superoxide dismutase activity                                                                                                                                                                         | orf19.2770.1/SOD1             |
| CPAR2_808660 | -4.59            | -4.53            | alditol:NADP+ 1-oxidoreductase activity and role in D-xylose catabolic process, arabinose catabolic process, cellular response to oxidative stress                                                    | C3_06860C_A                   |
| CPAR2_406810 | -4.42            | -4.59            | role in cellular response to oxidative stress, pathogenesis and plasma membrane localization                                                                                                          | C2_06870C_A/PST1              |
| CPAR2_101680 | -3.97            | -5.25            | nitric oxide dioxygenase activity, nitric oxide reductase activity                                                                                                                                    | CR_07790C_A/YHB1              |
| CPAR2_101350 | -3.67            | -2.87            | D-xylose:NADP reductase activity, NADPH binding, mRNA binding activity                                                                                                                                | C5_02930C_A/GRE3              |
| CPAR2_204330 | -3.52            | -3.07            | ADP binding, ATP binding, ATPase activity, coupled, chaperone binding, misfolded protein binding, unfolded protein binding activity                                                                   | CR_08250C_A/HSP104            |
| CPAR2_806210 | -3.41            | -4.03            | role in NADH oxidation, positive regulation of apoptotic process, regulation of reactive oxygen species metabolic process, response to singlet oxygen and mitochondrion, nucleus localization         | C2_08100W_A                   |
| CPAR2_804600 | -3.36            | -3.12            | Ortholog(s) have glutamate decarboxylase activity and role in cellular response to oxidative stress, glutamate catabolic process                                                                      | C1_11660W_A/GAD1              |
| CPAR2_406510 | -3.35            | -4.7             | DNA-binding transcription factor activity, RNA polymerase II-specific, RNA polymerase II proximal promoter sequence-specific DNA binding activity                                                     | C2_07170C_A/AFT2              |
| CPAR2_208070 | -3.26            | -2.69            | superoxide dismutase copper chaperone activity and role in cellular copper ion homeostasis, cellular response to metal ion, protein maturation by copper ion transfer, removal of superoxide radicals | C1_07180W_A/CCS1              |
| CPAR2_103080 | -2.63            | -2.89            | glyoxalase III activity and role in cellular response to nutrient levels, cellular response to oxidative stress, methylglyoxal catabolic process to D-lactate via S-lactoyl-glutathione               | C3_02610C_A/GLX3              |
| CPAR2_209930 | -2.54            | -3.54            | DNA-binding transcription factor activity, RNA polymerase II-specific activity                                                                                                                        | C2_05860C_A                   |
| CPAR2_109280 | -2.51            | -3.01            | manganese ion binding, superoxide dismutase activity                                                                                                                                                  | C1_01520C_A/SOD2              |
| CPAR2_808750 | -2.47            | -2.08            | alditol:NADP+ 1-oxidoreductase activity, glycerol dehydrogenase [NAD(P)+] activity, mRNA binding activity                                                                                             | C3_07340W_A/GCY1              |
| CPAR2_601800 | -2.4             | -1.84            | cytochrome-b5 reductase activity, acting on NAD(P)H activity and role in cellular response to oxidative stress, ergosterol biosynthetic process                                                       | C6_02040W_A/MCR1              |
| CPAR2_704130 | -2.39            | -2.77            | role in cellular response to drug, cellular response to oxidative stress and                                                                                                                          | C7_03220C_A/ZCF29             |

|                     |       |       |                                                                                                                                                                                                     |                         |
|---------------------|-------|-------|-----------------------------------------------------------------------------------------------------------------------------------------------------------------------------------------------------|-------------------------|
|                     |       |       | filamentous growth of a population of unicellular organisms in response to biotic stimulus, more                                                                                                    |                         |
| <i>CPAR2_804070</i> | -2.34 | -3.4  | DNA-binding transcription factor activity, RNA polymerase II-specific, RNA polymerase II regulatory region sequence-specific DNA binding activity                                                   | <i>CR_00630W_A</i>      |
| <i>CPAR2_105790</i> | -2.28 | -2.5  | disulfide oxidoreductase activity, glutathione peroxidase activity, glutathione transferase activity and role in cellular response to oxidative stress, glutathione metabolic process, pathogenesis | <i>CI_00490C_A/TTR1</i> |
| <i>CPAR2_200560</i> | -2.04 | -2.15 | S-(hydroxymethyl)glutathione dehydrogenase activity, alcohol dehydrogenase (NAD) activity, hydroxymethylfurfural reductase (NADH) activity                                                          | <i>CR_10250C_A/FDH3</i> |
| <i>CPAR2_301730</i> | -1.88 | -2.27 | DNA-binding transcription factor activity, RNA polymerase II-specific, proximal promoter sequence-specific DNA binding activity                                                                     | <i>CI_08940C_A/MSN4</i> |
| <i>CPAR2_500390</i> | -1.75 | -1.73 | superoxide dismutase activity                                                                                                                                                                       | <i>C4_02320C_A/SOD1</i> |
| <i>CPAR2_204160</i> | -1.72 | -2.44 | role in cellular response to oxidative stress, chromatin silencing at silent mating-type cassette, pathogenesis                                                                                     | <i>CR_05390W_A/PST3</i> |
| <i>CPAR2_600070</i> | -1.59 | -1.73 | actin filament binding, protein binding, bridging activity                                                                                                                                          | <i>C6_02730W_A/SAC6</i> |
| <i>CPAR2_102830</i> | -1.37 | -1.72 | Ortholog(s) have cytochrome-c peroxidase activity, role in cellular response to reactive oxygen species and mitochondrial intermembrane space, mitochondrial membrane localization                  | <i>C3_02480C_A/CCP1</i> |

271 \*only genes with p <0.01 according to EdgeR are displayed

272 \*\*-Inf, no reads detected

273

274

### 275 ***C. parapsilosis* is exposed to ROS during phagocytosis by *P. aurantium***

276 The oxidative burst leading to production of ROS occurs frequently when phagocytes  
 277 encounter microbial prey. The repression of catalases and superoxide dismutases, but  
 278 concurrent induction of genes involved in redox homeostasis prompted us to analyze whether  
 279 *C. parapsilosis* is exposed to ROS during interaction with the fungivorous predator. When co-  
 280 incubating *C. parapsilosis* with *P. aurantium* in the presence of the superoxide ( $\cdot\text{O}_2^-$ )  
 281 indicator dihydroethidium (DHE), an increase in red fluorescence of cultures was specific to  
 282 the presence of amoebae and reached a maximum after 10 min of co-incubation (Fig. 5A).  
 283 Fluorescence microscopy of single cells of *P. aurantium* using either DHE or the alternative  
 284 ROS sensor CellROX<sup>®</sup> Deep Red further revealed that ROS production was locally specific to  
 285 *P. aurantium* actively feeding on *C. parapsilosis* (Fig. 5B), suggesting that yeast cells are  
 286 exposed to increased levels of ROS upon phagocytic processing in *P. aurantium*.

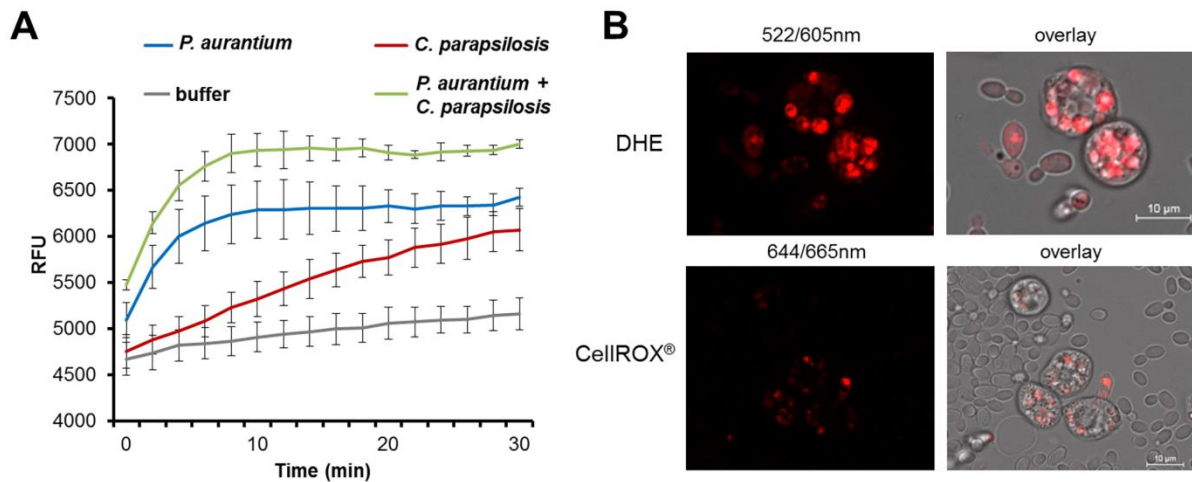

287

288 **Fig. 5: ROS production by *P. aurantium* during phagocytosis of *C. parapsilosis*.** (A) ROS were  
289 determined indirectly as the increase in DHE oxidation over 30 min in co-incubations of *C.*  
290 *parapsilosis* with *P. aurantium*. Data represent mean RFU ( $\lambda_{\text{ex}}$  522/  $\lambda_{\text{em}}$  605 nm) of three independent  
291 samples over 30 min. (B) ROS production was primarily localized to feeding cells of *P. aurantium*.  
292 Cells were co-incubated with *C. parapsilosis* in the presence of ROS sensitive probes DHE or  
293 CellROX® Deep Red and images were taken after 30 min.

294

295

296 **Copper and redox homeostasis contribute to the resistance against *P. aurantium* and**  
297 **macrophages**

298 The expression profile and its similarity to its orthologue in *C. albicans* suggested a role for  
299 Crp1 of *C. parapsilosis* in detoxification of high Cu levels. Deleting *CpCRP1* ( $\Delta/\Delta\text{crp1}$ )  
300 displayed no apparent growth defect in SD medium at 30°C and the mutant strain tolerated  
301 even high concentrations of Cu above 1 mM. Its sensitivity towards this transition metal  
302 changed dramatically when cells were exposed to a more acidic pH on solid or in liquid media  
303 (Fig. 6). At a pH of 3, *CpCRP1* proved to be important for growth at Cu concentrations  
304 between 500 and 1000  $\mu\text{M}$ , indicating that the function of Crp1p could be crucial under the  
305 acidic conditions of the phagolysosome.

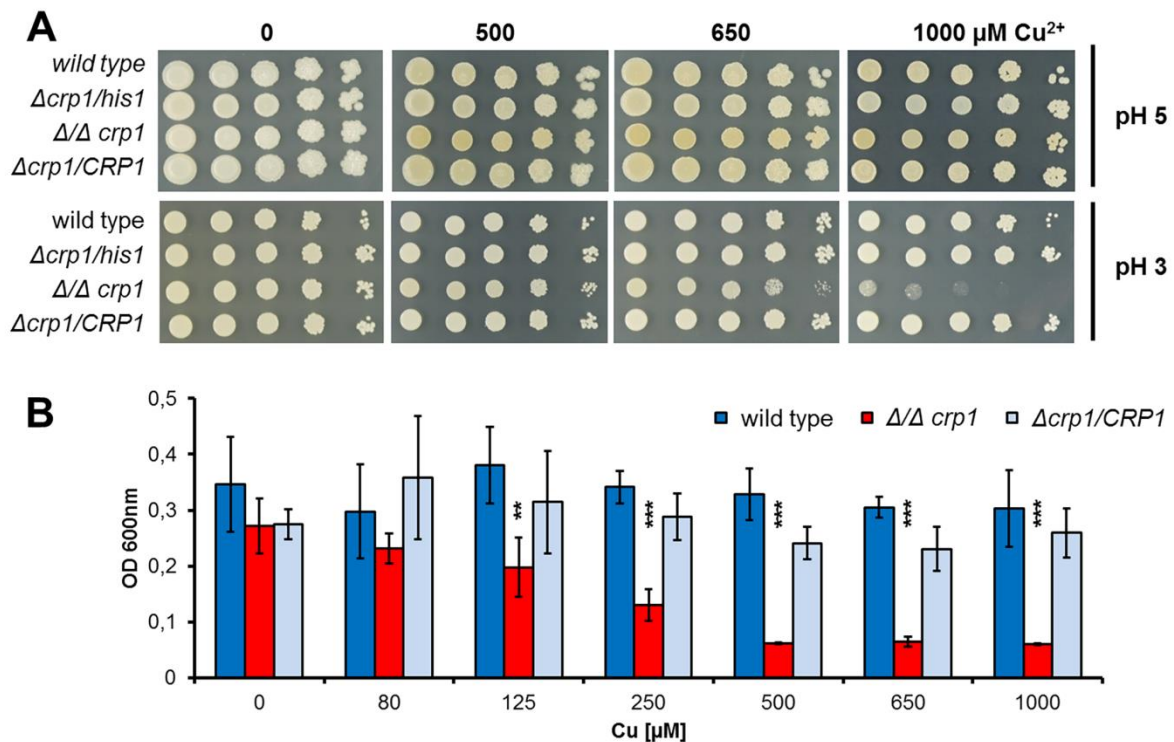

306

307

308 **Fig. 6: Crp1p protects *C. parapsilosis* from high Cu levels at acidic pH.** **A.** The  $\Delta\Delta crp1$  mutant  
 309 strain showed a pH-dependent copper sensitivity in comparison to the wild type during growth at pH  
 310 3. **B.** Increased sensitivity of the  $\Delta\Delta crp1$  mutant strain to high Cu concentrations in liquid malt extract  
 311 (pH 3) compared to the wild type and complemented strain. Data represent the mean and standard  
 312 deviation of three biological replicates with asterisks indicating statistical significance in an unpaired  
 313 Student's t-test between the values obtained for the  $\Delta\Delta crp1$  strain and the wild type (\*\*\*,  $p < 0.001$ ).  
 314

314

315 We also addressed the antioxidant function of *PRX1* in *C. parapsilosis*, by subjecting a  
 316 homozygous mutant ( $\Delta\Delta prx1$ ) to oxidative stress delivered by hydrogen peroxide ( $H_2O_2$ ) and  
 317 *tert*-butyl hydroperoxide (*t*-bOOH). The sensitivity of the mutant towards  $H_2O_2$  was nearly  
 318 indistinguishable from the wild type and the organic peroxide had only a mild effect on the  
 319 growth of  $\Delta\Delta prx1$  on solid medium supplemented with adenine, uracil, and 9 amino acids  
 320 (Fig. 7A). However, the impact of oxidative stress was more severe when these supplements  
 321 were omitted from the medium. Under these conditions, growth in liquid medium was  
 322 significantly reduced for  $\Delta\Delta prx1$  even in the absence of an external stressor (Fig. 7B). When  
 323 using 11 selective dropouts, each one lacking a single component, we found that a lack of  
 324 methionine was responsible for the growth defect of  $\Delta\Delta prx1$ . The omission of methionine  
 325 from the normal medium, in combination with the organic peroxide affected the wild type and  
 326 the mutant strains to similar extents (Fig. 7C).

327

328



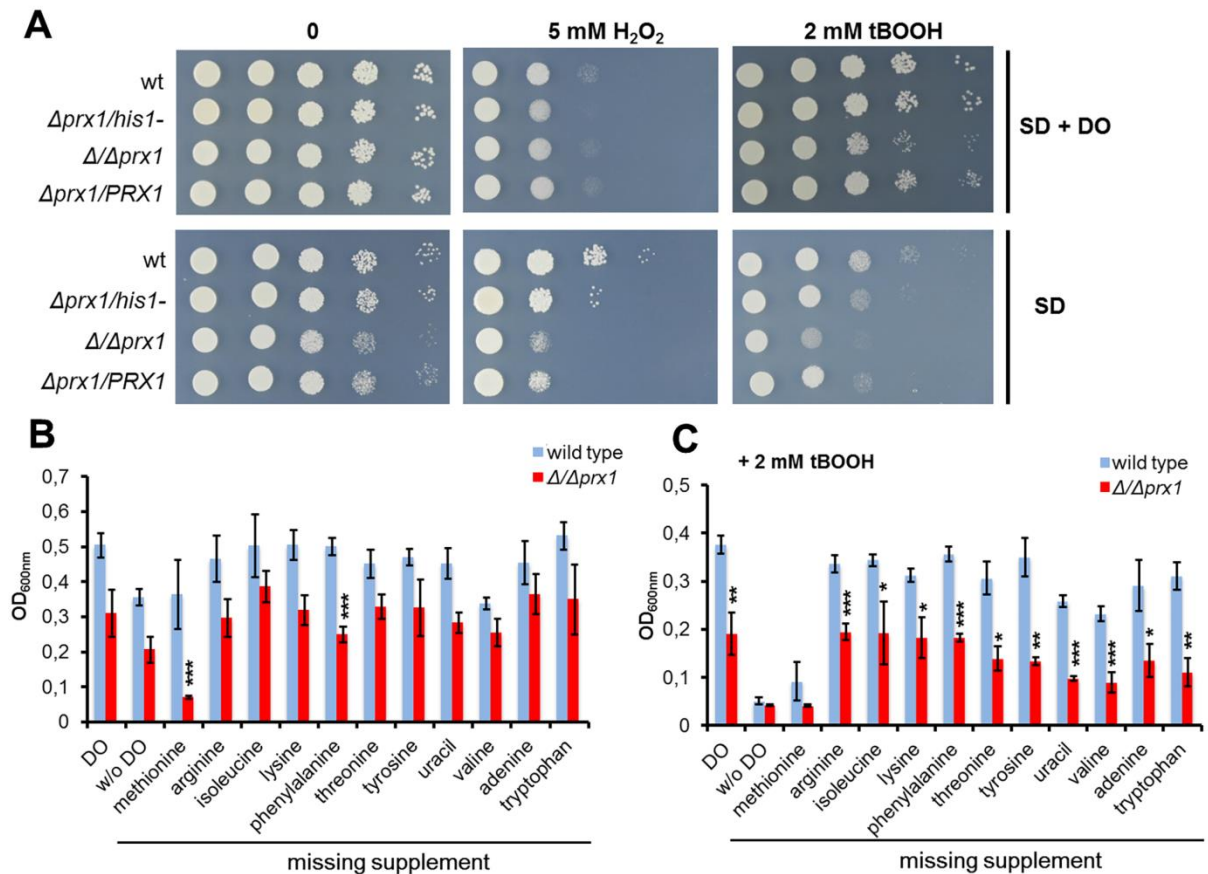

329

330 **Fig. 7: The antioxidant role of *PRX1* in *C. parapsilosis*.** **A.** Growth of *C. parapsilosis* on solid SD  
331 media with or without drop-out supplement (DO) in the presence of tBOOH or H<sub>2</sub>O<sub>2</sub> as oxidative  
332 stressors. **B and C.** Growth of the wild type (wt) and the  $\Delta/\Delta prx1$  mutant in liquid SD media,  
333 supplemented with drop-out solutions, selectively missing one essential component (B) and in the  
334 presence of tbOOH (C). Growth was measured as optical density at 600 nm. Data represent the mean  
335 and standard deviation of three biological replicates with asterisks indicating statistical significance in  
336 an unpaired Student's t-test between the values obtained for the  $\Delta/\Delta prx1$  mutant in comparison to wt  
337 (\*p < 0.05, \*\* p < 0.01, \*\*\*p < 0.001).

338

339 Both *CRP1* and *PRX1* are widely conserved across the *Candida* clade, including several  
340 species without any record as commensals or pathogens (Fig. S3). To test whether these two  
341 genes contribute to the defense against an environmental predator, the deletion mutants for  
342 *CRP1* and *PRX1* were confronted with *P. aurantium*. Both mutants showed decreased  
343 survival in comparison to the wild type after 3 hours of co-incubation (Fig. 8A). As we  
344 hypothesized that both mechanisms for stress defence could also contribute to survival when  
345 encountering human innate immune cells, we performed another co-incubation assay with  
346 primary macrophages. Both  $\Delta/\Delta crp1$  and  $\Delta/\Delta prx1$  displayed reduced survival when  
347 confronted with MDMs (Fig. 8B), indicating that these genes not only mediate resistance to  
348 copper and oxidative stress during predation by amoeba but could also play a role during  
349 immune evasion in a human host.

350

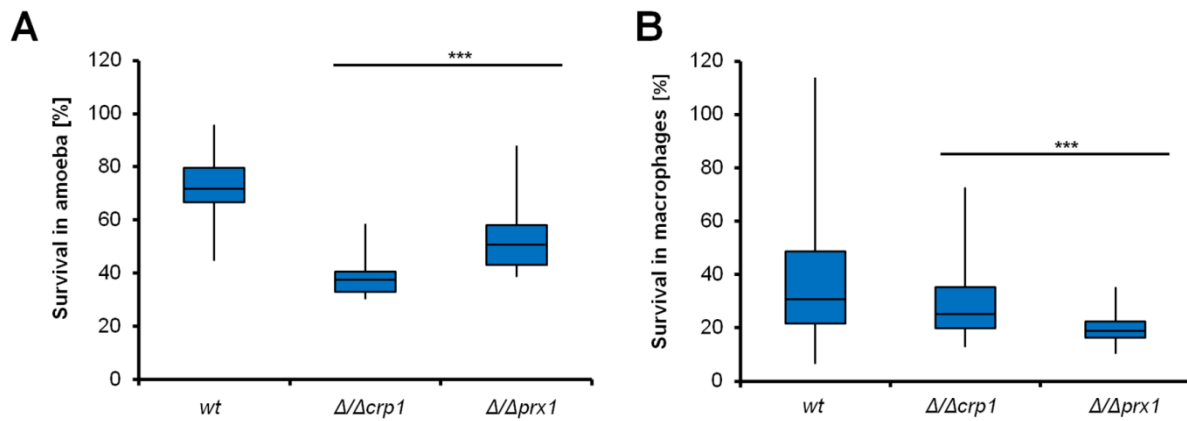

351

352 **Fig. 8: Survival of *C. parapsilosis* strains during amoeba predation (A) and phagocytosis by**  
353 **primary macrophages (B).** Strains of *C. parapsilosis* were incubated with *P. aurantium* for 3 h at a  
354 yeast-to-amoeba ratio of 10:1 (A) or with primary macrophages isolated from at least 6 different  
355 anonymous donors at a yeast-to-macrophage ratio of 1:1 (B). The number of survivors was determined  
356 by plating the cells on YPD media and counting the CFUs. The boxes signify the 25<sup>th</sup> and 75<sup>th</sup>  
357 percentile. The median is represented by a short black line within the box for each strain. The whiskers  
358 indicate the highest and lowest values from three independent biological and six technical replicates.  
359 Asterisks show statistical significance in an unpaired Student's t-test between the values obtained for  
360 the null mutants in comparison to the parental strain, wt (\*\*\*, p<0.001).

## 361 Discussion

362 The arms race between phagocytic predators and their microbial prey is thought to have  
363 shaped virulence determinants of bacteria and fungi (21, 38). Amoebae are predominant  
364 environmental micro-predators, but only a few of them have been described to actively feed  
365 on fungi (39-41). Such a fungivorous lifestyle has been described for *Protostelium*  
366 *mycophagum*, the type species for the polyphyletic group of protosteloid amoebae that form  
367 microscopic, stalked fruiting bodies from single cells and are found on nearly all continents  
368 (42-45). We have recently isolated and characterized a strain of *P. aurantium* (formerly  
369 known as *Planoprotostelium aurantium*), which was found to selectively recognize, kill, and  
370 feed on a wide range of ascomycete and basidiomycete yeasts, including major human  
371 pathogens of the *Candida* clade (32). *C. parapsilosis* acted as a preferred food source, while  
372 *C. albicans* was found to be protected from initial recognition by an extensive coat of  
373 mannoproteins, and *C. glabrata* showed delayed processing after ingestion. A similar survival  
374 strategy seems to rescue *C. glabrata* when encountering macrophages. Here, its ability to  
375 persist and even replicate inside the phagocyte has been well documented and characterized to  
376 the level of single genes (15, 16, 46). A functional genomic approach identified 23 genes in *C.*  
377 *glabrata* which were critically involved in the survival of macrophage phagocytosis (47).  
378 When comparing this set of 23 genes to all genes expressed during predation by *P. aurantium*,  
379 we found 7 genes to be highly upregulated ( $\log_2FC > 1.5$ ) at both time points. The three most  
380 upregulated genes with a  $\log_2FC$  of more than 2 were *CgGNT1* (CAGL0I09922g), *CgOST6*  
381 (CAGL0G07040g), and *CgPMT2* (CAGL0J08734g); all involved either in cell wall  
382 modification or protein glycosylation.

383 All these genes share orthologues with the other two *Candida* species, but when confronted  
384 with *P. aurantium*, only *PMT2* was upregulated in *C. parapsilosis* and even more so in  
385 *C. albicans*. In the latter, the gene encodes an essential protein, O-mannosyltransferase, which  
386 renders the cell more resistant to antifungals and cell wall perturbing agents (48, 49). The  
387 upregulation of mannan synthesis in *C. albicans* in the presence of the predator seems not to  
388 be limited to O-linked mannans, but was also observed for the N-linked type. *MNN2* and  
389 *MNN22* are two members of another well-characterized family of N-mannosyltransferases  
390 whose absence severely affects the mannoprotein coat of *C. albicans* (50, 51). Both genes  
391 showed induction levels comparable to *PMT2*. The pivotal role of the mannan coat of  
392 *C. albicans* during an interaction with phagocytes of the innate immunity is well studied, as  
393 defective O- and N-linked mannosylation led to an increased uptake and phagosomal

394 maturation, most likely through unmasking of  $\beta$ -glucans and enhanced recognition of *C.*  
395 *albicans* via the Dectin-1 receptor (52, 53). The fact that mannan biosynthesis was  
396 upregulated in *C. albicans* is in agreement with the previous finding that mannosidase-treated  
397 cells were internalized more frequently by *P. aurantium* (32).

398 The different interaction patterns of the three yeasts were partially reflected throughout the  
399 transcriptome of their orthologous genes. Although, a large gene set was induced in *C.*  
400 *glabrata*, this showed relatively low variation over time, indicating that *C. glabrata* responds  
401 to the presence of the amoeba, but not to predation or killing. This may explain why the  
402 general response to the predator comprised only 79 orthologues. Of these, 48 were commonly  
403 induced, among them the orthologues of *CDC54*, *CDC46*, and *MCM3*, indicating that all three  
404 yeast species were metabolically active in the M/G1 phase of the cell cycle (54). Genes  
405 involved in fatty acid catabolism were generally induced while their biosynthesis was rather  
406 repressed. In contrast, amino acid biosynthesis was commonly upregulated, and as this was  
407 seen also for the non-internalized *C. albicans*, it presumably results rather from the response  
408 to the nutrient-deprived growth medium used during the confrontation than from direct  
409 interaction with the amoeba.

410  
411 Of over 1,500 orthologous genes that were differentially regulated in either *C. albicans* or  
412 *C. parapsilosis*, only 251 were common DEOs for both species. Within this gene set, the  
413 impact on Cu homeostatic genes was preeminent, especially for *C. parapsilosis*, and the null  
414 mutant for *CRPI*, the gene with the highest induction, which pointed towards a vital role of  
415 copper during predation by *P. aurantium*. Intoxication by copper is especially effective in  
416 highly acidic environments as occur during early maturation of the phagolysosome and has  
417 been shown as an effective strategy of macrophages to control the primary intracellular  
418 pathogen *Mycobacterium tuberculosis* (55). Of all three species, inhibition of phagolysosomal  
419 acidification has exclusively been reported for *C. glabrata* (16), which might explain why Cu  
420 resistance genes were not found to not respond in this yeast. Elevating copper and ROS within  
421 its acidic phagolysosome was also found for the bacteriovorous amoeba *Dictyostelium*  
422 *discoideum* and has most likely contributed to the spread of copper resistance islands among  
423 bacterial pathogens (56). From this perspective, it cannot be surprising that highly tuned  
424 copper homeostatic systems were elucidated in the major environmentally acquired fungal  
425 pathogens *Aspergillus fumigatus* and *Cryptococcus neoformans* (57, 58). Both fungi also  
426 exploit similar escape strategies when confronted with amoebae or mammalian phagocytes  
427 (23, 25, 59). A recent screening approach identified Sur7 as a Cu-protective protein which

428 reduces membrane permeability to Cu in *C. albicans* (60). Although downregulation of  
429 *CaSUR7* was observed at both time points after confrontation with the amoeba, its putative *C.*  
430 *parapsilosis* orthologue (CPAR2\_602600) showed higher expression after one hour of co-  
431 incubation with *P. aurantium*. Also, for *C. glabrata* which seems to lack a *CRP1* orthologue,  
432 *CgSUR7* (CAGL0L01551g) was highly induced at both time points. At least some of the toxic  
433 effects of Cu could well be inflicted via Fenton-type chemistry with ROS, which were  
434 actively produced in feeding *P. aurantium*. Their impact on the yeast would likely be further  
435 aggravated by the downregulation of nearly all SODs, as seen for *C. parapsilosis*, and, to a  
436 lesser degree, also for *C. albicans* during confrontation with the predator. At least for *C.*  
437 *albicans* it is well known that it can adapt the expression of its SOD genes according to the  
438 availability of the metal cofactors (61), thus high levels of copper and ROS, as seen here,  
439 should activate the expression of genes encoding the SOD of the Cu/Zn type. However, these  
440 genes in particular are severely repressed in *C. albicans* and *C. parapsilosis* (Table S3),  
441 suggesting that the predator could interfere with the normal response to ROS via a yet  
442 unknown mechanism.

443

444 The one-cysteine peroxiredoxin *PRX1* was among the very few oxidative stress genes which  
445 expression was increased in *C. parapsilosis*. Its orthologous gene was also upregulated during  
446 in *C. albicans* during co-incubation with macrophages (62). We found that an essential  
447 cellular function of *PRX1* is tightly linked to a lack of methionine. Intriguingly, among the  
448 only 48 commonly upregulated genes in all three *Candida* species, 5 are involved in the  
449 metabolism of sulfur-containing amino acids (*ECM17*, *MET15*, *MET16*, *MET3*, *SAM2*). For  
450 all five genes, the induction was lowest for *C. glabrata*. Amino acid deprivation, and more  
451 specifically a limitation in methionine, also occurs in the phagolysosome of neutrophilic  
452 granulocytes (63, 64). Sensitivity to ROS is phenotypically well established for the  
453 methionine biosynthesis pathway in baker's yeast, as mutants lacking either SOD1 or its  
454 chaperone CCS1 were unable to grow in normoxic environments due to a methionine  
455 auxotrophic phenotype (65, 66).

456

457 In conclusion, our results indicate that the fungivorous feeding by the predator *P. aurantium*  
458 activates the fungal Cu and redox homeostasis which is essential to shield methionine  
459 biosynthesis from oxidative inactivation. After millions of years of coevolution of amoebae  
460 and fungi, it is well conceivable that such basic molecular tools for resistance against

461 environmental phagocytes proved to be valuable for survival in phagocytic cells of higher  
462 eukaryotes, like humans and mammals.

## 463 **Material and Methods**

464

### 465 **Strains and growth conditions**

466 *Protostelium aurantium* var. *fungivorum* has been isolated in Jena, Germany, as described  
467 previously (31). Isolated amoebae were further grown in standard-size Petri dishes  
468 (94x16 mm, Greiner Bio-One, Austria) in PBS (80 g l<sup>-1</sup> NaCl, 2 g l<sup>-1</sup> KCl, 26.8 g l<sup>-1</sup> Na<sub>2</sub>HPO<sub>4</sub>  
469 x 7 H<sub>2</sub>O, 2.4 g l<sup>-1</sup> KH<sub>2</sub>PO<sub>4</sub>, pH 6.6) with *Rhodotorula mucilaginosa* as a food source at 22°C,  
470 if not stated differently. All yeast strains are listed in Table S4. If not indicated otherwise, all  
471 fungi were grown in YPD medium (1 % yeast extract, 2 % peptone, 2 % glucose) at 30°C,  
472 supplemented with 1.5 % [w/v] agar for growth on solid media. Mutant strains of *C.*  
473 *parapsilosis* were grown on SD-agar (0.4 % [w/v] yeast nitrogen base with ammonium  
474 sulfate, 2 % [w/v] glucose, 1.5 % [w/v] agar), supplemented with 10 % [v/v] of a selective  
475 drop-out solution excluding leucine or histidine. Complemented strains were grown on YPD  
476 agar supplemented with 100 µg ml<sup>-1</sup> nourseothricin (clonNAT, Werner BioAgents, Jena,  
477 Germany).

478

### 479 **Confrontation of *Candida* sp. with *P. aurantium***

480 *P. aurantium* was pre-cultured in 20 x wMY medium at 22°C and cells were washed with  
481 fresh medium, scraped from the surface, harvested by centrifugation for 10 min at 800 x g and  
482 resuspended in 20 x wMY (40 mg l<sup>-1</sup> yeast extract, 40 mg l<sup>-1</sup> malt extract, 0.75 g l<sup>-1</sup>  
483 K<sub>2</sub>HPO<sub>4</sub>). *Candida* sp. were grown overnight in YPD medium at 30°C, harvested, washed  
484 twice with cold 20 x wMY. Yeast cells were resuspended and adapted in fresh 20 x wMY at  
485 room temperature. Amoebae and yeast cells were counted in an automatic cell counter  
486 (Casy<sup>®</sup>TT Cell Counter, OLS Bio, Germany). Confrontations were carried out by spreading  
487 mixtures of both interaction partners at prey-predator ratios of 10:1 on 20 x wMY agar-plates  
488 (120 x 120 x 17 mm, Greiner Bio-One). At indicated time points cells were washed off the  
489 plate and centrifuged at 3000 rpm, 5 min. Pellets were immediately frozen in liquid N<sub>2</sub> and  
490 used for the isolation of total RNA. Four independent amoeba and yeast cultures were used in  
491 this experiment.

492

### 493 **RNA isolations from yeast cells and co-cultures with *P. aurantium***

494 Frozen cell pellets from yeast cultures or co-incubations with *P. aurantium* were resuspended  
495 in TES buffer (10 mM Tris-HCl, pH 7.5, 10 mM EDTA, 0.5% [w/v] SDS) and transferred  
496 into a chilled tube containing zirconia beads (ZYMO Research, Irvine, CA, USA). Primary

497 extractions of RNA were performed with acidic phenol:chloroform (5:1) shaking at 1,500 rpm  
498 at 65°C for 30 min in a thermoblock. Afterwards, samples were frozen at -80°C for 30 min,  
499 centrifuged at 10,000 g for 15 min for phase separation. Samples underwent two more  
500 extractions using phenol:chloroform (5:1) and chloroform:isoamyl alcohol (24:1). Total RNA  
501 was equilibrated with 10% [w/v] of 3 M sodium acetate (pH 5.2) and precipitated in ice-cold  
502 ethanol. After centrifugation, precipitates were washed in 70 % [v/v] ethanol, air dried, and  
503 dissolved in nuclease-free water. RNA samples were stored at -80°C until use.

504

### 505 **RNA isolations from yeast cells after confrontation with monocyte-derived macrophages** 506 **(MDMs)**

507 Adherent macrophages with attached and ingested yeast cells were washed and subsequently  
508 lysed by adding RLT lysis buffer containing  $\beta$ -mercaptoethanol (Qiagen, Hilden, Germany)  
509 and shock-freezing the plate in liquid nitrogen. Cells were detached by scraping and  
510 transferred into screw cap tubes, sedimented by centrifugation, and washed once with RLT  
511 buffer to remove most of the host RNA. Yeast pellets were shock-frozen again in liquid  
512 nitrogen and stored at -80°C. For RNA isolation, pellets were resuspended in 400  $\mu$ l of AE  
513 buffer (50 mM sodium acetate pH 5.3 and 10 mM EDTA) and 40  $\mu$ l of 10 % [w/v] SDS.  
514 After mixing for 30 sec, cells were extracted with phenol: chloroform: isoamyl alcohol  
515 [25:24:1] for 5 min at 65°C and then frozen at -80°C. Phase separations, precipitation, and  
516 resuspension of the purified RNA were performed as above.

517

### 518 **RNA sequencing and analysis of expression data**

519 The preparation of cDNA libraries from total RNA and the sequencing was performed at LGC  
520 Genomics GmbH (Berlin, Germany). Briefly, the quality of RNA samples was first controlled  
521 using a 2100 Bioanalyzer (Agilent, CA, USA). Next, samples were enriched for mRNA using  
522 oligo-dT binding and magnetic separation using the NEBNext Poly(A) Magnetic Isolation  
523 Module (New England Biolabs). Samples were reverse transcribed using the NEBNext RNA  
524 First and Second Strand Synthesis Modules (New England Biolabs) and purified. The Encore  
525 Rapid DR Multiplex system (Nugen) was used for preparation of cDNA-libraries which were  
526 amplified in a volume of 100  $\mu$ l for 15 cycles using MyTaq (Bioline) and standard Illumina  
527 primers. From these libraries, 2 x 75 bp (*C. parapsilosis*) or 2 x 150 bp (*C. albicans* and *C.*  
528 *glabrata*) paired-end reads were sequenced on an Illumina MiSeq platform. FastQC (67) and  
529 Trimmomatic v0.32 (68) were used for quality control and trimming of library adaptors.  
530 Mapping of reads was achieved with TopHat2 v2.1.0 (69) against the reference genomes of *C.*



531 *parapsilosis*, *C. glabrata*, and *C. albicans* in combination with the genome of *P. aurantium*.  
532 Differential gene expression between time points was analyzed with EdgeR (70). A list of all  
533 differentially expressed genes is provided as Dataset S1. All sequencing data is available from  
534 the GEO repository under the accession number GSE116535. The Venn diagram was  
535 computed using the package “VennDiagram” from the statistical programming language R.  
536 The genes in all areas of the Venn diagram are listed in Dataset S4. The PCA was conducted  
537 using the method “prcomp” from the “stats” package of R.

538

### 539 **Gene ontology analysis**

540 Gene ontology (GO) clustering analysis was performed on all differentially up- and  
541 downregulated genes of three *Candida* species using GO Slim (71) - Mapper tool available at  
542 the Candida Genome Database (<http://www.candidagenome.org/cgi-bin/GO/goTermMapper>)  
543 for *biological process*, *molecular function*, and *cellular component*. All data from the Gene  
544 Ontology analysis is provided as Dataset S2.

545

### 546 **Quantitative real-time reverse transcription-PCR (qRT-PCR)**

547 For all qRT-PCR reactions 1 µg of total RNA was treated with DNase using RQ1 RNase-free  
548 DNase (Promega, USA) and transcribed into cDNA (RevertAid First Strand cDNA Synthesis  
549 Kit, Thermo Scientific). The cDNA was diluted 1:10 and used for qRT-PCR with SYBR  
550 Select Master Mix (Applied Biosystems) performed in a thermocycler (Step One Plus,  
551 Applied Biosystems). The experiments were done in three biological and three technical  
552 replicates. The expression rates reported here are relative to the expression values of the  
553 housekeeping gene *ACT1* of *C. parapsilosis*. All primers are listed in Table S5.

554

### 555 **Detection of reactive oxygen species**

556 The production of reactive oxygen species (ROS) during amoeba predation was measured  
557 using dihydroethidium (DHE; Thermo Fisher, Dreieich, Germany) at a final concentration of  
558 10 µM. Amoebae and yeasts were seeded at an MOI of 10. Increased fluorescence, indicating  
559 ROS production, was measured using an Infinite M200 Pro fluorescence plate reader (Tecan,  
560 Männedorf, Switzerland) in intervals of 2 min over a 30 min period at  $\lambda_{\text{ex}}$  522 nm/ $\lambda_{\text{em}}$  605 nm.  
561 ROS production was further visualized by using DHE staining as mentioned above or  
562 CellROX<sup>®</sup> Deep Red staining (Thermo Fisher) at a final concentration of 5 µM. Fluorescence  
563 images were captured using the Zeiss Axio Observer 7 Spinning Disk Confocal Microscope  
564 (Zeiss, Germany) at the  $\lambda_{\text{ex}}$  370 nm/ $\lambda_{\text{em}}$  420 nm (for non-oxidized DHE),

565  $\lambda_{\text{ex}}$  535 nm/ $\lambda_{\text{em}}$  610 nm (for oxidized DHE), and at  $\lambda_{\text{ex}}$  640 nm/ $\lambda_{\text{em}}$  665 nm CellROX<sup>®</sup> Deep  
566 Red.

567

### 568 **Construction of gene deletions and complementations in *C. parapsilosis***

569 Target genes were deleted from the leucine and histidine auxotrophic parental strain  
570 CLIB2014 using a fusion PCR method described previously (72) and adapted to *C.*  
571 *parapsilosis* (73). All primer sequences and target genes are listed in Table S5. Briefly,  
572 approximately 500 bp of the upstream and downstream DNA loci of the coding sequence  
573 were amplified by PCR with the primer pairs P1/P3 and P4/P6, respectively. The selectable  
574 markers, *C. dubliniensis* *HIS1* and *C. maltosa* *LEU2* genes were amplified with the P2/P5  
575 primer pair from the plasmids pSN52 and pSN40, respectively. All PCR products were further  
576 purified using Gel/PCR DNA Fragments Extraction Kit (Geneaid Biotech, New Taipei City,  
577 Taiwan) and connected *via* PCR through overlapping sequences of the P2/P3 and P4/P5  
578 primer pairs. The entire deletion cassette was amplified using primers P1 and P6 and  
579 transformed into the recipient strain in two rounds of transformation. The first allele was  
580 replaced by the *CmLEU2* marker and the second allele with the *CdHIS1* marker. Site-specific  
581 integration of the selection marker was checked by PCR at both ends of the deletion  
582 constructs. Loss of expression was also confirmed by qRT-PCR targeting the respective ORF  
583 (Fig. S4A-D).

584 To generate complemented strains, the neutral locus NEUT5L was targeted as described in  
585 (74). The promoter-OR-terminator regions were amplified from the CLIB214 parental strain  
586 using specific rec\_F/R primers listed in Table S5. The dominant nourseothricin resistance  
587 marker *NAT1*, and a modified sequence of *C. parapsilosis* NEUT5L locus, were amplified  
588 from plasmid pDEST\_TDH3\_NAT\_CpNEUT5L\_NheI using Clon\_F/Clon\_R primers. The 5'  
589 tails of *gene name\_rec\_F/gene name\_rec\_R* primers contained flanking regions  
590 complementary to the sequence of Clon\_F/Clon\_R primers to allow fusion *via* circular  
591 polymerase extension cloning (CPEC cloning). The completely assembled plasmids (Fig.  
592 S4E) were directly used for transformation of *E. coli* DH5 $\alpha$  without further purification. After  
593 purification from *E. coli* up to 3  $\mu$ g of plasmid were enzymatically digested with *StuI* or *HpaI*  
594 and *EcoRI* to confirm their correct size. The modified sequence of *C. parapsilosis* NEUT5L  
595 locus contains a specific restriction site for *StuI* which linearised the plasmid and enables the  
596 integration of the vector into the NEUT5L locus of *C. parapsilosis* *via* duplication. Integration  
597 of the vector into the genome of the parental strain was confirmed by PCR.

598

## 599 **Chemical transformation of *C. parapsilosis***

600 Overnight cultures of *C. parapsilosis leu2Δ/his1Δ* were diluted to an OD<sub>600</sub> of 0.2 in YPD  
601 media and grown at 30°C/180 rpm to an OD<sub>600</sub> of 1. The culture was harvested by  
602 centrifugation at 4,000 g for 5 min and the pellet was suspended in 3 ml of ice-cold water.  
603 After collecting the cells, the pellet was resuspended in 1 ml of TE with LiAc (0.1 M lithium  
604 acetate, 10 mM Tris-HCl, 1 mM EDTA, pH 7.5), followed by centrifugation for 30 s at  
605 14,000 g. Cells were then suspended in 200 µl of the ice-cold TE-LiAc buffer. For  
606 transformation, 10 µl of boiled herring sperm DNA (2 mg/ml) and 20 µl of transforming  
607 DNA were added to 100 µl of competent cells. The mixture was incubated at 30°C without  
608 shaking for 30 min followed by the addition of 700 µl of PLATE solution (0.1 M lithium  
609 acetate, 10 mM Tris-HCl, 1 mM EDTA, pH 7.5 and 40 % PEG 3350). Afterwards, the  
610 samples were incubated overnight at 30 °C. The next day, samples were heat-shocked at  
611 44 °C for 15 min, centrifuged, and washed twice with YPD medium. Following incubation in  
612 100 µl of YPD for 2 hours (180 rpm, 30°C), samples were plated on SD agar plates,  
613 supplemented with essential amino acids, and either histidine or leucine to obtain  
614 heterozygous mutant strains. To select for homozygous mutant, histidine and leucine were  
615 omitted from the medium. Selective plates were incubated for two days at 30°C. To select for  
616 complemented strains, cells were plated on YPD agar with 100 µg ml<sup>-1</sup> of nourseothricin.

617

## 618 **Sensitivity assays**

619 Yeasts were grown overnight in YPD at 30°C/180 rpm, harvested by centrifugation at 10,000  
620 g for 1 min, and washed twice with PBS. For droplet assays, cells were diluted to the  
621 concentration of 5x10<sup>7</sup> ml<sup>-1</sup> and 5 µl of serial 10-fold dilutions were dropped on agar plates.  
622 To determine the MIC<sub>50</sub> of Cu, 2.5x10<sup>4</sup> cells were seeded in a 96 well plate with malt extract  
623 broth buffered to pH 3 and CuSO<sub>4</sub>. For oxidative stress sensitivity assays, 11 selective drop-  
624 out solutions, each missing one component, were added to liquid SD medium (0.4 % [w/v]  
625 yeast nitrogen base with ammonium sulfate, 2 % [w/v] glucose) with or without 2 mM of *t*-  
626 BOOH (Luperox<sup>®</sup> TBH70X, Sigma-Aldrich, USA) and approx. 3x10<sup>2</sup> cells were seeded in 48  
627 well plates. All plates were incubated at 30°C for two days. Growth in well plates was  
628 evaluated by measuring the optical density (OD<sub>600</sub>) in a plate reader (Infinite M200 Pro,  
629 Tecan, Männedorf, Switzerland). Data represent the average of 3 biological replicates.

630

## 631 **Isolation of monocyte-derive macrophages (MDMs)**

632 Human peripheral blood mononuclear cells (PBMCs) were isolated by density centrifugation.  
633 PBMCs from buffy coats donated by healthy volunteers were separated through Lymphocytes  
634 Separation Media (Capricorn Scientific, Germany) in Leucosep™ centrifuge tubes (Greiner  
635 Bio-One). Magnetically labelled CD14 positive monocytes were selected by automated cell  
636 sorting (autoMACs; Miltenyi Biotec, Germany). To differentiate monocytes into MDMs,  
637  $1.7 \times 10^7$  cells were seeded into 175 cm<sup>2</sup> cell culture flasks in RPMI 1640 media with L-  
638 glutamine (Thermo Fisher Scientific) containing 10 % heat-inactivated fetal bovine serum  
639 (FBS; Bio&SELL, Germany) and 50 ng ml<sup>-1</sup> recombinant human M-CSF (ImmunoTools,  
640 Germany) and incubated for five days at 37 °C and 5 % CO<sub>2</sub> until the medium was  
641 exchanged. Stimulation with human M-CSF favours the differentiation to M2-type  
642 macrophages. After two additional days, adherent MDMs were detached with 50 mM EDTA  
643 in PBS and seeded in 6-well plates (for expression analysis) or in 96-well plates (for killing  
644 assay) to a final concentration of  $1 \times 10^6$  or  $4 \times 10^4$  MDMs/well, respectively in RPMI + 10 %  
645 FBS and 50 ng ml<sup>-1</sup> M-CSF and incubated overnight.

#### 646 **Ethics statement**

647 Blood donations for subsequent isolation of PBMCs were obtained from healthy donors after  
648 written, informed consent, in accordance with the Declaration of Helsinki. All protocols were  
649 approved by the Ethics Committee of the University Hospital Jena (permission number 2207-  
650 01/08).

651

#### 652 ***P. aurantium* and macrophage killing assays**

653 Yeast strains were grown overnight in YPD medium at 30 °C and 180 rpm, harvested by  
654 centrifugation, and counted in a CASY® TT Cell Counter (OLS Bio, Bremen, Germany).  
655 Amoebae were grown to confluency in PB, harvested by scraping, and counted. Yeast cells  
656 were co-incubated with amoebae or macrophages in 96-well plates at MOIs of 10 and 1,  
657 respectively, and incubated at 22°C or 37°C/5% CO<sub>2</sub>, respectively, for 3 hours. Yeast cells  
658 surviving the amoeba predation were collected by vigorous pipetting and plated on YPD agar.  
659 For macrophage killing assays, yeast cells were added to macrophages in 96-well plates at an  
660 MOI of 1 (killing assays) or in 6-well plates at an MOI of 10 (isolation of total RNA) with  
661 RPMI medium containing L-glutamine. Media control wells for each time point were  
662 included, where the yeast cells were incubated in RPMI alone without macrophages. Plates  
663 were incubated at 37°C in an atmosphere with 5% CO<sub>2</sub>. Cells surviving the macrophage  
664 killing were first collected from the supernatant, then, intracellular survivors were obtained  
665 after lysis of macrophages with 0.5 % Triton™-X-100 for 15 min. The number of survived

666 yeast cells was calculated as a percentage of CFUs compared to the inoculum. Data are based  
667 on three biological and six technical replicates (*P. aurantium*) and six different anonymous  
668 donors with 6 technical replicates (macrophages), respectively.

669

## 670 **Acknowledgements**

671 This work was supported by grants of the European Social Fund ESF “Europe for Thuringia”  
672 (2015FGR0097 to FH and 2016FGR0053 to JL) and a grant from the German Research  
673 Foundation (DFG, HI 1574/2-1). SR was supported by a fellowship of the DFG funded  
674 excellence graduate school “Jena School of Microbial Communication”—JSMC. This work  
675 was also supported by the DFG CRC/Transregio 124 “Pathogenic fungi and their human host:  
676 Networks of interaction” subproject INF (TW). MS was supported within the DFG priority  
677 program SPP1580 ‘Intracellular compartments as places of host-pathogen interactions’ (Hu  
678 528/17–1). AG was funded by GINOP-2.3.2-15-2016-00035, by GINOP-2.3.3-15-2016-  
679 00006 and by NKFIH K123952.

680

## 681 **Author contributions**

682 SR performed most experimental work with input from JLS, RT, and MS. FH, AG, SB, and  
683 GP supervised the experimental work. Bioinformatic processing and analysis of RNA-Seq  
684 data was performed by JL and TW. SR and FH wrote the paper. All authors analyzed the data  
685 and commented on the manuscript.

686

## 687 **Declaration of Interests**

688 The authors declare no competing interests.

689

## 690 References

- 691 1. Dadar M, Tiwari R, Karthik K, Chakraborty S, Shahali Y, Dhama K. *Candida albicans* -  
692 Biology, molecular characterization, pathogenicity, and advances in diagnosis and control - An  
693 update. *Microb Pathogen*. 2018;117:128-38. Epub 2018/02/20.
- 694 2. Robinson HA, Pinharanda A, Bensasson D. Summer temperature can predict the distribution of  
695 wild yeast populations. *Ecol Evol*. 2016;6(4):1236-50.
- 696 3. Maganti H, Bartfai D, Xu J. Ecological structuring of yeasts associated with trees around  
697 Hamilton, Ontario, Canada. *FEMS Yeast Res*. 2012;12(1):9-19.
- 698 4. Bensasson D, Dicks J, Ludwig JM, Bond CJ, Elliston A, Roberts IN, et al. Diverse Lineages of  
699 *Candida albicans* Live on Old Oaks. *Genetics*. 2019;211(1):277.
- 700 5. Greppi A, Krych Ł, Costantini A, Rantsiou K, Hounhouigan DJ, Arneborg N, et al. Phytase-  
701 producing capacity of yeasts isolated from traditional African fermented food products and  
702 PHYPk gene expression of *Pichia kudriavzevii* strains. *Int J Food Microbiol*. 2015;205:81-9.
- 703 6. Morrison-Whittle P, Lee SA, Fedrizzi B, Goddard MR. Co-evolution as Tool for Diversifying  
704 Flavor and Aroma Profiles of Wines. *Front Microbiol*. 2018;9(910).
- 705 7. Erwig LP, Gow NA. Interactions of fungal pathogens with phagocytes. *Nat Rev Microbiol*.  
706 2016;14(3):163-76.
- 707 8. Seider K, Heyken A, Luttich A, Miramon P, Hube B. Interaction of pathogenic yeasts with  
708 phagocytes: survival, persistence and escape. *Curr Opin Microbiol*. 2010;13(4):392-400. Epub  
709 2010/07/16.
- 710 9. Uwamahoro N, Verma-Gaur J, Shen H-H, Qu Y, Lewis R, Lu J, et al. The Pathogen *Candida*  
711 *albicans* Hijacks Pyroptosis for Escape from Macrophages. *MBio*. 2014;5(2).
- 712 10. Wellington M, Koselny K, Sutterwala FS, Krysan DJ. *Candida albicans* triggers NLRP3-  
713 mediated pyroptosis in macrophages. *Eukaryot Cell*. 2014;13(2):329-40. Epub 2014/01/01.
- 714 11. Kasper L, Konig A, Koenig PA, Gresnigt MS, Westman J, Drummond RA, et al. The fungal  
715 peptide toxin Candidalysin activates the NLRP3 inflammasome and causes cytolysis in  
716 mononuclear phagocytes. *Nat Commun*. 2018;9(1):018-06607.
- 717 12. Toth R, Toth A, Papp C, Jankovics F, Vagvolgyi C, Alonso MF, et al. Kinetic studies of  
718 *Candida parapsilosis* phagocytosis by macrophages and detection of intracellular survival  
719 mechanisms. *Front Microbiol*. 2014;5:633. Epub 2014/12/06.
- 720 13. Linden JR, Maccani MA, Laforce-Nesbitt SS, Bliss JM. High Efficiency Opsonin-Independent  
721 Phagocytosis of *Candida parapsilosis* by Human Neutrophils. *Med Mycol*.  
722 2010;48(2):10.1080/13693780903164566.
- 723 14. Sasada M, Johnston RB, Jr. Macrophage microbicidal activity. Correlation between  
724 phagocytosis-associated oxidative metabolism and the killing of *Candida* by macrophages. *J*  
725 *Exp Med*. 1980;152(1):85-98.
- 726 15. Kaur R, Ma B, Cormack BP. A family of glycosylphosphatidylinositol-linked aspartyl proteases  
727 is required for virulence of *Candida glabrata*. *Proceed Natl Acad Sci USA*. 2007;104(18):7628-  
728 33. Epub 2007/04/26.
- 729 16. Seider K, Brunke S, Schild L, Jablonowski N, Wilson D, Majer O, et al. The facultative  
730 intracellular pathogen *Candida glabrata* subverts macrophage cytokine production and  
731 phagolysosome maturation. *J Immunol*. 2011;187(6):3072-86.
- 732 17. Pesole G, Lotti M, Alberghina L, Saccone C. Evolutionary origin of nonuniversal CUG<sub>Ser</sub> codon  
733 in some *Candida* species as inferred from a molecular phylogeny. *Genetics*. 1995;141(3):903-7.

- 734 18. Gabaldon T, Martin T, Marcet-Houben M, Durrens P, Bolotin-Fukuhara M, Lespinet O, et al.  
735 Comparative genomics of emerging pathogens in the *Candida glabrata* clade. BMC Genomics.  
736 2013;14(623):1471-2164.
- 737 19. Turner SA, Butler G. The *Candida* pathogenic species complex. Cold Spring Harb Perspect  
738 Med. 2014;4(9).
- 739 20. Gabaldon T, Fairhead C. Genomes shed light on the secret life of *Candida glabrata*: not so  
740 asexual, not so commensal. Curr Genet. 2019;65(1):93-8.
- 741 21. Casadevall A, Fu MS, Guimaraes AJ, Albuquerque P. The 'Amoeboid Predator-Fungal Animal  
742 Virulence' Hypothesis. J Fungi. 2019;5(1).
- 743 22. Steenbergen JN, Nosanchuk JD, Malliaris SD, Casadevall A. *Cryptococcus neoformans*  
744 virulence is enhanced after growth in the genetically malleable host *Dictyostelium discoideum*.  
745 Infect Immun. 2003;71(9):4862-72.
- 746 23. Steenbergen JN, Shuman HA, Casadevall A. *Cryptococcus neoformans* interactions with  
747 amoebae suggest an explanation for its virulence and intracellular pathogenic strategy in  
748 macrophages. Proceed Natl Acad Sci USA. 2001;98(26):15245-50.
- 749 24. Van Waeyenberghe L, Bare J, Pasmans F, Claeys M, Bert W, Haesebrouck F, et al. Interaction  
750 of *Aspergillus fumigatus* conidia with *Acanthamoeba castellanii* parallels macrophage-fungus  
751 interactions. Environ Microbiol Rep. 2013;5(6):819-24.
- 752 25. Hillmann F, Novohradská S, Mattern DJ, Forberger T, Heinekamp T, Westermann M, et al.  
753 Virulence determinants of the human pathogenic fungus *Aspergillus fumigatus* protect against  
754 soil amoeba predation. Environ Microbiol. 2015;17(8):2858-69.
- 755 26. Koller B, Schramm C, Siebert S, Triebel J, Deland E, Pfefferkorn AM, et al. *Dictyostelium*  
756 *discoideum* as a Novel Host System to Study the Interaction between Phagocytes and Yeasts.  
757 Front Microbiol. 2016;7(1665).
- 758 27. Aguilar M, Lado C, Spiegel FW. Protostelids from deciduous forests: first data from  
759 southwestern Europe. Mycol Res. 2007;111(Pt 7):863-72. Epub 2007/08/08.
- 760 28. Ndiritu GG, Stephenson SL, Spiegel FW. First records and microhabitat assessment of  
761 protostelids in the Aberdare Region, Central Kenya. J Eukaryot Microbiol. 2009;56(2):148-58.  
762 Epub 2009/05/22.
- 763 29. Shadwick JD, Stephenson SL, Spiegel FW. Distribution and ecology of protostelids in Great  
764 Smoky Mountains National Park. Mycologia. 2009;101(3):320-8. Epub 2009/06/20.
- 765 30. Zahn G, Stephenson SL, Spiegel FW. Ecological distribution of protosteloid amoebae in New  
766 Zealand. PeerJ. 2014;2:e296. Epub 2014/04/02.
- 767 31. Hillmann F, Forbes G, Novohradská S, Ferling I, Riege K, Groth M, et al. Multiple Roots of  
768 Fruiting Body Formation in Amoebozoa. Genome Biol Evol. 2018;10(2):591-606. Epub  
769 2018/01/30.
- 770 32. Radosa S, Ferling I, Sprague JL, Westermann M, Hillmann F. The different morphologies of  
771 yeast and filamentous fungi trigger distinct killing and feeding mechanisms in a fungivorous  
772 amoeba. Environ Microbiol. 2019;13(10):1462-2920.
- 773 33. Bochman ML, Schwacha A. The Mcm Complex: Unwinding the Mechanism of a Replicative  
774 Helicase. Microbiol Mol Biol Rev. 2009;73(4):652-83.
- 775 34. Navarathna DH, Lionakis MS, Lizak MJ, Munasinghe J, Nickerson KW, Roberts DD. Urea  
776 amidolyase (DUR1,2) contributes to virulence and kidney pathogenesis of *Candida albicans*.  
777 PloS one. 2012;7(10):e48475. Epub 2012/11/13.
- 778 35. Skrzypek MS, Binkley J, Binkley G, Miyasato SR, Simison M, Sherlock G. The *Candida*  
779 Genome Database (CGD): incorporation of Assembly 22, systematic identifiers and

- 780 visualization of high throughput sequencing data. *Nucleic Acids Res.* 2017;45(D1):D592-D6.  
781 Epub 2016/10/13.
- 782 36. Weissman Z, Berdicevsky I, Cavari BZ, Kornitzer D. The high copper tolerance of *Candida*  
783 *albicans* is mediated by a P-type ATPase. *Proceed Natl Acad Sci USA.* 2000;97(7):3520-5.  
784 Epub 2000/03/29.
- 785 37. Srinivasa K, Kim NR, Kim J, Kim M, Bae JY, Jeong W, et al. Characterization of a putative  
786 thioredoxin peroxidase prx1 of *Candida albicans*. *Mol Cells.* 2012;33(3):301-7. Epub  
787 2012/03/07.
- 788 38. Brussow H. Bacteria between protists and phages: from antipredation strategies to the evolution  
789 of pathogenicity. *Mol Microbiol.* 2007;65(3):583-9.
- 790 39. Old KM, Darbyshire JF. Soil fungi as food for giant amoebae. *Soil Biol and Biochem.*  
791 1978;10(2):93-100.
- 792 40. Old KM. Giant soil amoebae cause perforation of conidia of *Cochliobolus sativus*. *Transact Brit*  
793 *Mycol Soc.* 1977;68(2):277-81.
- 794 41. Chakraborty S, Old KM, Warcup JH. Amoebae from a take-all suppressive soil which feed on  
795 *Gaeumannomyces graminis tritici* and other soil fungi. *Soil Biol Biochem.* 1983;15(1):17-24.
- 796 42. Spiegel FW, Shadwick LL, Ndiritu GG, Brown MW, Aguilar M, Shadwick JD. Protosteloid  
797 Amoebae (Protosteliida, Protosporangiida, Cavosteliida, Schizoplasmodiida, Fractoviteliida,  
798 and Sporocarpic Members of Vannelliida, Centramoebida, and Pellitida). In: Archibald JM,  
799 Simpson AGB, Slamovits CH, Margulis L, Melkonian M, Chapman DJ, et al., editors.  
800 *Handbook of the Protists.* Cham: Springer International Publishing; 2017. p. 1-38.
- 801 43. Kang S, Tice AK, Spiegel FW, Silberman JD, Panek T, Cepicka I, et al. Between a Pod and a  
802 Hard Test: The Deep Evolution of Amoebae. *Mol Biol Evol.* 2017;34(9):2258-70.
- 803 44. Shadwick LL, Spiegel FW, Shadwick JDL, Brown MW, Silberman JD. Eumycetozoa =  
804 Amoebozoa?: SSUrDNA Phylogeny of Protosteloid Slime Molds and Its Significance for the  
805 Amoebozoan Supergroup. *PloS one.* 2009;4(8):e6754.
- 806 45. Shadwick JDL, Silberman JD, Spiegel FW. Variation in the SSUrDNA of the Genus  
807 *Protostelium* Leads to a New Phylogenetic Understanding of the Genus and of the Species  
808 Concept for *Protostelium mycophaga* (Protosteliida, Amoebozoa). *J Eukaryot Microbiol.*  
809 2018;65(3):331-44.
- 810 46. Kasper L, Seider K, Hube B. Intracellular survival of *Candida glabrata* in macrophages:  
811 immune evasion and persistence. *FEMS Yeast Research.* 2015;15(5):fov042. Epub 2015/06/13.
- 812 47. Seider K, Gerwien F, Kasper L, Allert S, Brunke S, Jablonowski N, et al. Immune evasion,  
813 stress resistance, and efficient nutrient acquisition are crucial for intracellular survival of  
814 *Candida glabrata* within macrophages. *Eukaryot Cell.* 2014;13(1):170-83.
- 815 48. Lengeler KB, Tielker D, Ernst JF. Protein-O-mannosyltransferases in virulence and  
816 development. *Cell Mol Life Sci.* 2007;65(4):528.
- 817 49. Peltroche-Llacsahuanga H, Goyard S, d'Enfert C, Prill SK, Ernst JF. Protein O-  
818 mannosyltransferase isoforms regulate biofilm formation in *Candida albicans*. *Antimicrob*  
819 *Agents Chemother.* 2006;50(10):3488-91.
- 820 50. Hall RA, Bates S, Lenardon MD, Maccallum DM, Wagener J, Lowman DW, et al. The Mnn2  
821 mannosyltransferase family modulates mannoprotein fibril length, immune recognition and  
822 virulence of *Candida albicans*. *PLoS Pathog.* 2013;9(4):25.
- 823 51. Hall RA, Gow NAR. Mannosylation in *Candida albicans*: role in cell wall function and immune  
824 recognition. *Mol Microbiol.* 2013;90(6):1147-61.



- 825 52. Bain JM, Louw J, Lewis LE, Okai B, Walls CA, Ballou ER, et al. *Candida albicans* hypha  
826 formation and mannan masking of beta-glucan inhibit macrophage phagosome maturation.  
827 MBio. 2014;5(6):01874-14.
- 828 53. McKenzie CG, Koser U, Lewis LE, Bain JM, Mora-Montes HM, Barker RN, et al. Contribution  
829 of *Candida albicans* cell wall components to recognition by and escape from murine  
830 macrophages. Infect Immun. 2010;78(4):1650-8.
- 831 54. Cote P, Hogues H, Whiteway M. Transcriptional analysis of the *Candida albicans* cell cycle.  
832 Mol Biol Cell. 2009;20(14):3363-73.
- 833 55. Wolschendorf F, Ackart D, Shrestha TB, Hascall-Dove L, Nolan S, Lamichhane G, et al.  
834 Copper resistance is essential for virulence of *Mycobacterium tuberculosis*. Proceed Natl Acad  
835 Sci USA. 2011;108(4):1621-6.
- 836 56. Hao X, Luthje F, Ronn R, German NA, Li X, Huang F, et al. A role for copper in protozoan  
837 grazing - two billion years selecting for bacterial copper resistance. Mol Microbiol.  
838 2016;102(4):628-41.
- 839 57. Ding C, Festa RA, Chen Y-L, Espart A, Palacios Ò, Espín J, et al. *Cryptococcus neoformans*  
840 copper detoxification machinery is critical for fungal virulence. Cell Host Microbe.  
841 2013;13(3):265-76.
- 842 58. Wiemann P, Perevitsky A, Lim FY, Shadkchan Y, Knox BP, Landero Figueora JA, et al.  
843 *Aspergillus fumigatus* Copper Export Machinery and Reactive Oxygen Intermediate Defense  
844 Counter Host Copper-Mediated Oxidative Antimicrobial Offense. Cell Rep. 2017;19(5):1008-  
845 21.
- 846 59. Novohradská S, Ferling I, Hillmann F. Exploring Virulence Determinants of Filamentous  
847 Fungal Pathogens through Interactions with Soil Amoebae. Front Cell Infect Microbiol.  
848 2017;7:497. Epub 2017/12/21.
- 849 60. Douglas LM, Konopka JB. Plasma membrane architecture protects *Candida albicans* from  
850 killing by copper. PLoS Genet. 2019;15(1):e1007911-e.
- 851 61. Li CX, Gleason JE, Zhang SX, Bruno VM, Cormack BP, Culotta VC. *Candida albicans* adapts  
852 to host copper during infection by swapping metal cofactors for superoxide dismutase. Proceed  
853 Natl Acad Sci USA. 2015;112(38):E5336-E42.
- 854 62. Lorenz MC, Bender JA, Fink GR. Transcriptional Response of *Candida albicans* upon  
855 Internalization by Macrophages. Eukaryotic Cell. 2004;3(5):1076-87.
- 856 63. Rubin-Bejerano I, Fraser I, Grisafi P, Fink GR. Phagocytosis by neutrophils induces an amino  
857 acid deprivation response in *Saccharomyces cerevisiae* and *Candida albicans*. Proceed Natl  
858 Acad Sci USA. 2003;100(19):11007-12.
- 859 64. Miramón P, Dunker C, Windecker H, Bohovych IM, Brown AJP, Kurzai O, et al. Cellular  
860 Responses of *Candida albicans* to Phagocytosis and the Extracellular Activities of Neutrophils  
861 Are Critical to Counteract Carbohydrate Starvation, Oxidative and Nitrosative Stress. PloS one.  
862 2012;7(12):e52850.
- 863 65. Chang EC, Kosman DJ. O<sub>2</sub>-dependent methionine auxotrophy in Cu,Zn superoxide dismutase-  
864 deficient mutants of *Saccharomyces cerevisiae*. J Bacteriol. 1990;172(4):1840-5.
- 865 66. Culotta VC, Klomp LW, Strain J, Casareno RL, Krems B, Gitlin JD. The copper chaperone for  
866 superoxide dismutase. J Biol Chem. 1997;272(38):23469-72.
- 867 67. Andrew S. FastQC: a quality control tool for high throughput sequence data. Available online  
868 at: <http://www.bioinformatics.babraham.ac.uk/projects/fastqc2010>.
- 869 68. Bolger AM, Lohse M, Usadel B. Trimmomatic: a flexible trimmer for Illumina sequence data.  
870 Bioinformatics. 2014;30(15):2114-20.

- 871 69. Kim D, Pertea G, Trapnell C, Pimentel H, Kelley R, Salzberg SL. TopHat2: accurate alignment  
872 of transcriptomes in the presence of insertions, deletions and gene fusions. *Genome Biol.*  
873 2013;14(4):R36.
- 874 70. Robinson MD, McCarthy DJ, Smyth GK. edgeR: a Bioconductor package for differential  
875 expression analysis of digital gene expression data. *Bioinformatics.* 2010;26(1):139-40.
- 876 71. Mi H, Huang X, Muruganujan A, Tang H, Mills C, Kang D, et al. PANTHER version 11:  
877 expanded annotation data from Gene Ontology and Reactome pathways, and data analysis tool  
878 enhancements. *Nucleic Acids Res.* 2017;45(D1):D183-D9.
- 879 72. Noble SM, Johnson AD. Strains and strategies for large-scale gene deletion studies of the  
880 diploid human fungal pathogen *Candida albicans*. *Eukaryot Cell.* 2005;4(2):298-309.
- 881 73. Holland LM, Schroder MS, Turner SA, Taff H, Andes D, Grozer Z, et al. Comparative  
882 phenotypic analysis of the major fungal pathogens *Candida parapsilosis* and *Candida albicans*.  
883 *PLoS Pathog.* 2014;10(9):e1004365. Epub 2014/09/19.
- 884 74. Gerami-Nejad M, Zacchi LF, McClellan M, Matter K, Berman J. Shuttle vectors for facile gap  
885 repair cloning and integration into a neutral locus in *Candida albicans*. *Microbiol.* 2013;159(Pt  
886 3):565-79. Epub 2013/01/12.
